# Supplementary material for: Burden of Cause-Specific Mortality Associated With PM2.5 Air Pollution in the United States
Source: PubMed Central journal article supplement (PMC6902821; doi:10.1001/jamanetworkopen.2019.15834), 2019-11-20
Supplement: jamanetwopen-2-e1915834-s001.pdf [file jamanetwopen-2-e1915834-s001.pdf]

## Supplementary Online Content

Bowe B, Xie Y, Yan Y, Al-Aly Z. Burden of cause-specific mortality associated with PM<sub>2.5</sub> air pollution in the United States. *JAMA Netw Open*. 2019;2(11):e1915834. doi:10.1001/jamanetworkopen.2019.15834

**eMethods.** Additional Information on Methods

### eReferences

**eTable 1.** ICD-10 Cause of Death Codes Used for Cause Categories and Specific Causes

**eTable 2.** Association of Ambient Fine Sodium With Cause-Specific Mortality (N=2,167,831)

**eTable 3.** Total Events and Incidence Rates of Deaths (per 1,000 Person-Years) Overall and by Baseline PM<sub>2.5</sub> Quartile Standardized for Age, Race, Sex, and Smoking Status

**eTable 4.** Sensitivity Analyses of the Association Between PM<sub>2.5</sub> and Cause-Specific Mortality

**eTable 5.** Cause Specific Death Associated With PM<sub>2.5</sub> in the Contiguous US and by State

**eFigure 1.** Kaplan-Meier Curve of All-Cause Mortality

**eFigure 2.** Non-linear Exposure-Response Hazard Functions for Negative and Positive Outcome Controls

**eFigure 3.** Cumulative Incidence of Specific Causes of Death

**eFigure 4.** Non-linear Exposure-Response Hazard Functions for Cause-Specific Mortality

**eFigure 5.** Map of the Age-Standardized Death Rates Due to Non-accidental Causes Associated With PM<sub>2.5</sub> in the Contiguous United States by County

**eFigure 6.** Map of the Age-Standardized Death Rates Due to Non-communicable Diseases Associated With PM<sub>2.5</sub> in the Contiguous United States by County

**eFigure 7.** Age-Standardized Death Rates Due to Non-accidental Causes and Non-communicable Diseases Associated With PM<sub>2.5</sub> by County Area Deprivation Index and Percentage Black or African American

**eFigure 8.** Effect Modification of the Association of PM<sub>2.5</sub> With Risk of Death Due to Non-accidental Causes and Non-communicable Diseases by ADI Quartile and Black Race

**eFigure 9.** Burden of Death Due to Non-accidental Causes and Non-communicable Diseases Associated With PM<sub>2.5</sub> in the Contiguous US

**eFigure 10.** Maps of the Age-Standardized Death Rates Due to Specific Causes Associated With PM<sub>2.5</sub> in the Contiguous United States by State

This supplementary material has been provided by the authors to give readers additional information about their work.

## **eMethods: Additional Information on Methods**

### **Data Sources**

Demographics and location of residence at time of receipt of care was collected from the MedSAS datasets. Smoking status was obtained from the CDW Health Factors domain.

Demographics were additionally obtained from the Vital Status file. Data on date of death and underlying cause of death was obtained from the VA Suicide Registry, which links VA records with the National Death Index. Population density at the county level was obtained from the US Census Bureaus' Small Area Income and Poverty Estimates (SAIPE) data. Distribution of race and ethnicity in 2017 for each county was obtained from the 2017 American Community Survey 5-years estimates<sup>1</sup>.

### **Covariates**

Smoking status was categorized as never, former, or current smoker<sup>2</sup>. Race was categorized as white, black, or other. The Area Deprivation Index was summarized at the county level.

### **Statistical Analyses**

Incidence rates were standardized to the distribution of age, race, sex, and smoking status in the overall cohort. Stochastic imputation based on the fully conditional specification method was used to impute missing regional covariates using all domains of the CHR, ADI, population density, splines of latitude and longitude, and a state indicator<sup>3</sup>.

### **Non-linear exposure-response models**

Prior literature has suggested that the relation between PM<sub>2.5</sub> and health outcomes can follow a non-linear form<sup>4</sup>. However traditional non-linear analytic methods, such as splines, may result in non-monotonic relations that are biologically implausible<sup>5</sup>. In this study we applied the analytic framework put forth by Nasari and colleagues<sup>5</sup>. Briefly, Cox proportional hazard models with non-linear exposure-responses are constructed. Multiple models that allow for a wide variety of monotonic relations between PM<sub>2.5</sub> and death were explored.

The analyses are done using Cox proportional hazard models of the form:

$$\lambda(t|x, z) = \lambda_0(t) * \exp(\gamma'x + \beta * w(z|\mu, \tau) * f(z))$$

where  $\lambda_0(t)$  is the baseline hazard at time  $t$ , and  $\gamma'$  the vector of coefficients for covariate vector  $x$ . The term  $\beta * w(z|\mu, \tau) * f(z)$  relates the PM<sub>2.5</sub> ( $z$ ) to the hazard of the outcome.  $\beta$  is the coefficient,  $w(z|\mu, \tau)$  a logistic weighting function, and  $f(z)$  a function of PM<sub>2.5</sub>. The logistic weighting function is:

$$w(z|\mu, \tau) = \{1 + \exp(-\left(\frac{z - \mu}{\tau * r}\right))\}^{-1}$$

where  $\mu$  is a location parameter,  $\tau$  a parameter that controls the curvature of the weighting function, and  $r$  the range of  $z$ . The function  $f(z)$  may be either the identity or a natural log transformation of  $z$ . The analysis tests multiple iterations of the model, where  $\mu$ ,  $\tau$ , and  $f(z)$  are varied. Model fit, based on the  $-2LL$  is used to guide model construction until optimal fit is achieved. Beyond the optimal model, the top three best performing models are jointly used to construct an ensembled estimate, where models are weighted by differences in the likelihood. Data is trimmed at 1% tails during estimation to enhance model stability. Additional details are provided elsewhere, as is a SAS macro for conducting analyses using this method<sup>5</sup>. Continuous covariates were treated as natural cubic splines.

## **Sensitivity Analyses**

Time updated analyses we done through December 31, 2014, due to PM<sub>2.5</sub> estimate availability. A time period of a quarter of a year was used. Latitude and longitude were assigned on the basis of the latitude and longitude of the centroid of the participants county of residence. The Haversine equation was used in to calculated distance to the nearest air monitoring station. Ozone values were assigned on the basis of the nearest air monitoring station measuring ozone levels within 30 miles of the participants residence of location.

## **Attributable burden of death**

Data values used in the estimation of burden were 2014 EPA PM<sub>2.5</sub> values, the most recent estimates that were available, and 2017 CDC underlying death values, the most recent data available at the time of manuscript preparation.

The GEMM based estimate for the contiguous US was derived by combining age specific non-communicable and lower respiratory infection death parameters estimates with 2014 EPA PM<sub>2.5</sub> data and 2017 CDC death numbers by age range for each state, then summed<sup>6,7</sup>.

## **Disparities in burden**

Disparities in burden were estimated by linking county level burden estimates with 2017 ACS 5-year population estimates. The percent in a county of each race/ethnicity were applied to the estimated burden of death associated with PM<sub>2.5</sub>, and then combined to get overall burden in that race/ethnicity. For rates, population weighted averages were computed. This approach allows for quantification of the burden at the county level, leveraging the resolution of our estimates, however it assumes that death rates are equal amongst all race/ethnicities in the same county; this approach was taken due to limited data by race at the county level for death rates. ADI quartile was defined at the county level.

A negative binomial regression model with a log link was built, and the incident rate ratios were used in estimating the percentage associated using a PAF equation using 0 as the counterfactual scenario values for ADI and percent black or African American<sup>8</sup>. In this instance this is meant to represent a scenario where there are no disparities (that is where there are no differences in burden associated with differences in a county's racial or socio-economic makeup). An interaction between ADI and percentage black or African American suggested some overlap in effect (negative beta,  $p < 0.001$ ); we opted to incorporate the interaction into the racial disparity burden, as evidence suggests that a portion of observed racial disparities is attributable to socioeconomic disparities. Interactions with a p-value  $< 0.05$ , and improved Akaike Information Criteria (AIC) were taken as evidence of effect modification. A negative change in AIC indicates an improvement in model fit.

## References

1. 2013-2017 American Community Survey 5-Year Estimates.
2. McGinnis KA, Brandt CA, Skanderson M, et al. Validating smoking data from the Veteran's Affairs Health Factors dataset, an electronic data source. *Nicotine & Tobacco Research*. 2011;13(12):1233-1239.
3. Van Buuren S. Multiple imputation of discrete and continuous data by fully conditional specification. *Statistical methods in medical research*. 2007;16(3):219-242.
4. Cohen AJ, Brauer M, Burnett R, et al. Estimates and 25-year trends of the global burden of disease attributable to ambient air pollution: an analysis of data from the Global Burden of Diseases Study 2015. *The Lancet*. 2017;389(10082):1907-1918.
5. Nasari MM, Szyszkowicz M, Chen H, et al. A class of non-linear exposure-response models suitable for health impact assessment applicable to large cohort studies of ambient air pollution. *Air Quality, Atmosphere & Health*. 2016;9(8):961-972.
6. Lelieveld J, Klingmüller K, Pozzer A, et al. Cardiovascular disease burden from ambient air pollution in Europe reassessed using novel hazard ratio functions. *European heart journal*. 2019.
7. Burnett R, Chen H, Szyszkowicz M, et al. Global estimates of mortality associated with long-term exposure to outdoor fine particulate matter. *Proceedings of the National Academy of Sciences*. 2018;115(38):9592-9597.
8. Jaakkola MS, Jaakkola JJ. Assessment of public health impact of work-related asthma. *BMC medical research methodology*. 2012;12(1):22.

**eTable 1:** ICD-10 cause of death codes used for cause categories and specific causes

| <b>Cause</b>                          | <b>ICD10 Codes</b> |
|---------------------------------------|--------------------|
| Non-accidental                        | A00-R99            |
| Non-communicable diseases             | C00-N99, R00-R99   |
| Cerebrovascular disease               | I60-I69            |
| Chronic kidney disease                | N18-N19            |
| Chronic obstructive pulmonary disease | J40-J44            |
| Dementia                              | F01-F03, G30, R54  |
| Diabetes (Type 2)                     | E11                |
| Hypertension                          | I10-I15            |
| Cardiovascular disease                | I20-I25, I50       |
| Lung cancer                           | C33-C34            |
| Pneumonia                             | J12-J18            |

**eTable 2:** Association of ambient fine sodium with cause-specific mortality (N=2,167,831)

| <b>Cause</b>                                                                                  | <b>Hazard Ratio<sup>a</sup><br/>(95% CI)</b> |
|-----------------------------------------------------------------------------------------------|----------------------------------------------|
| Non-accidental causes                                                                         | 1.01 (1.00-1.01)                             |
| Non-communicable diseases                                                                     | 1.01 (1.00-1.01)                             |
| Cardiovascular disease                                                                        | 1.02 (1.02-1.03)                             |
| Chronic obstructive pulmonary disease                                                         | 1.00 (0.99-1.01)                             |
| Lung cancer                                                                                   | 1.00 (0.99-1.01)                             |
| <sup>a</sup> For every one IQR (0.072 µg/m <sup>3</sup> ) increase<br>CI, confidence interval |                                              |

**eTable 3:** Total events and incidence rates of deaths (per 1,000 person-years) overall and by baseline PM<sub>2.5</sub> quartile standardized for age, race, sex, and smoking status

| Cause                                                                                       | Total events (%)  | Incidence rate (95% CI)                                     |                                                              |                                                              |                                                              |
|---------------------------------------------------------------------------------------------|-------------------|-------------------------------------------------------------|--------------------------------------------------------------|--------------------------------------------------------------|--------------------------------------------------------------|
|                                                                                             |                   | PM <sub>2.5</sub> quartile 1: 4.8-10.0 (µg/m <sup>3</sup> ) | PM <sub>2.5</sub> quartile 2: 10.1-11.8 (µg/m <sup>3</sup> ) | PM <sub>2.5</sub> quartile 3: 11.9-13.8 (µg/m <sup>3</sup> ) | PM <sub>2.5</sub> quartile 4: 13.9-20.1 (µg/m <sup>3</sup> ) |
| Non-accidental                                                                              | 1,570,798 (34.74) | 25.48 (25.31-25.66)                                         | 26.09 (25.90-26.27)                                          | 26.78 (26.60-26.97)                                          | 27.03 (26.85-27.22)                                          |
| Non-communicable diseases                                                                   | 1,526,798 (33.76) | 24.49 (24.32-24.66)                                         | 25.00 (24.82-25.18)                                          | 25.63 (25.45-25.82)                                          | 25.87 (25.69-26.05)                                          |
| Cardiovascular disease                                                                      | 340,365 (7.53)    | 3.97 (3.90-4.03)                                            | 4.21 (4.14-4.28)                                             | 4.37 (4.30-4.44)                                             | 4.48 (4.40-4.55)                                             |
| Cerebrovascular disease                                                                     | 71,771 (1.6)      | 1.12 (1.08-1.15)                                            | 1.14 (1.11-1.18)                                             | 1.17 (1.14-1.21)                                             | 1.19 (1.15-1.23)                                             |
| Chronic Kidney Disease                                                                      | 29,016 (0.64)     | 0.36 (0.34-0.38)                                            | 0.42 (0.39-0.44)                                             | 0.48 (0.45-0.51)                                             | 0.44 (0.42-0.47)                                             |
| Chronic obstructive pulmonary disease                                                       | 124,294 (2.8)     | 1.65 (1.61-1.70)                                            | 1.57 (1.53-1.61)                                             | 1.54 (1.50-1.58)                                             | 1.53 (1.49-1.57)                                             |
| Dementia                                                                                    | 103,286 (2.3)     | 0.68 (0.66-0.70)                                            | 0.69 (0.67-0.71)                                             | 0.68 (0.66-0.70)                                             | 0.70 (0.68-0.72)                                             |
| Diabetes (Type 2)                                                                           | 14,448 (0.3)      | 0.29 (0.26-0.31)                                            | 0.25 (0.24-0.27)                                             | 0.24 (0.22-0.26)                                             | 0.27 (0.25-0.29)                                             |
| Hypertension                                                                                | 37,169 (0.8)      | 0.84 (0.81-0.87)                                            | 0.88 (0.84-0.91)                                             | 0.85 (0.82-0.89)                                             | 0.99 (0.96-1.03)                                             |
| Lung cancer                                                                                 | 128,469 (2.8)     | 1.89 (1.84-1.94)                                            | 2.03 (1.98-2.09)                                             | 2.12 (2.07-2.18)                                             | 2.02 (1.97-2.07)                                             |
| Pneumonia                                                                                   | 33,099 (0.7)      | 0.33 (0.31-0.35)                                            | 0.38 (0.36-0.40)                                             | 0.43 (0.41-0.45)                                             | 0.46 (0.43-0.48)                                             |
| Abbreviations: PM <sub>2.5</sub> , ambient fine particulate matter; CI, confidence interval |                   |                                                             |                                                              |                                                              |                                                              |



**eTable 4:** Sensitivity analyses of the association between PM<sub>2.5</sub> and cause-specific mortality

| Cause Category                        | Baseline Exposure | Exposure by 3-year average prior to baseline | Time updated exposure <sup>c</sup> | Time updated cumulative exposure <sup>d</sup> | Exposure by AMS within 30 miles <sup>a</sup> | Exposure by AMS within 10 miles <sup>b</sup> | Additionally adjusted for latitude and longitude | Additionally adjusted for ozone <sup>e</sup> |
|---------------------------------------|-------------------|----------------------------------------------|------------------------------------|-----------------------------------------------|----------------------------------------------|----------------------------------------------|--------------------------------------------------|----------------------------------------------|
| Non-accidental                        | 1.12 (1.11-1.12)  | 1.09 (1.08-1.10)                             | 1.20 (1.19-1.21)                   | 1.12 (1.11-1.13)                              | 1.13 (1.12-1.14)                             | 1.11 (1.01-1.12)                             | 1.09 (1.08-1.10)                                 | 1.10 (1.10-1.12)                             |
| Non-communicable diseases             | 1.12 (1.11-1.12)  | 1.09 (1.08-1.10)                             | 1.20 (1.19-1.21)                   | 1.12 (1.11-1.13)                              | 1.13 (1.12-1.14)                             | 1.11 (1.09-1.12)                             | 1.09 (1.08-1.10)                                 | 1.11 (1.10-1.12)                             |
| Cardiovascular disease                | 1.19 (1.18-1.21)  | 1.18 (1.16-1.19)                             | 1.27 (1.25-1.30)                   | 1.21 (1.18-1.23)                              | 1.17 (1.15-1.19)                             | 1.14 (1.11-1.17)                             | 1.15 (1.13-1.17)                                 | 1.21 (1.19-1.23)                             |
| Cerebrovascular disease               | 1.23 (1.19-1.26)  | 1.18 (1.14-1.22)                             | 1.33 (1.28-1.39)                   | 1.23 (1.18-1.28)                              | 1.25 (1.20-1.29)                             | 1.25 (1.19-1.31)                             | 1.18 (1.14-1.23)                                 | 1.21 (1.17-1.25)                             |
| Chronic Kidney Disease                | 1.29 (1.22-1.36)  | 1.22 (1.16-1.29)                             | 1.30 (1.22-1.39)                   | 1.21 (1.13-1.29)                              | 1.19 (1.12-1.26)                             | 1.13 (1.05-1.22)                             | 1.14 (1.07-1.22)                                 | 1.22 (1.15-1.29)                             |
| Chronic obstructive pulmonary disease | 1.07 (1.05-1.10)  | 1.04 (1.02-1.07)                             | 1.19 (1.15-1.22)                   | 1.09 (1.06-1.13)                              | 1.06 (1.03-1.09)                             | 1.05 (1.01-1.09)                             | 1.03 (1.00-1.07)                                 | 1.08 (1.05-1.11)                             |
| Dementia                              | 1.09 (1.06-1.12)  | 1.04 (1.01-1.07)                             | 1.19 (1.15-1.23)                   | 1.07 (1.04-1.11)                              | 1.13 (1.09-1.16)                             | 1.11 (1.06-1.15)                             | 1.04 (1.00-1.07)                                 | 1.03 (1.00-1.06)                             |
| Diabetes (Type 2)                     | 1.36 (1.27-1.46)  | 1.38 (1.28-1.48)                             | 1.57 (1.44-1.71)                   | 1.49 (1.37-1.62)                              | 1.18 (1.09-1.28)                             | 1.10 (0.99-1.23)                             | 1.45 (1.34-1.57)                                 | 1.46 (1.35-1.57)                             |
| Hypertension                          | 1.25 (1.20-1.30)  | 1.23 (1.17-1.28)                             | 1.55 (1.47-1.64)                   | 1.39 (1.32-1.47)                              | 1.34 (1.27-1.41)                             | 1.34 (1.26-1.42)                             | 1.23 (1.17-1.30)                                 | 1.16 (1.11-1.22)                             |
| Lung cancer                           | 1.11 (1.09-1.14)  | 1.08 (1.05-1.10)                             | 1.17 (1.13-1.20)                   | 1.09 (1.06-1.12)                              | 1.09 (1.06-1.12)                             | 1.09 (1.05-1.13)                             | 1.11 (1.08-1.14)                                 | 1.09 (1.06-1.12)                             |
| Pneumonia                             | 1.54 (1.47-1.61)  | 1.50 (1.43-1.57)                             | 1.77 (1.166-1.86)                  | 1.60 (1.51-1.70)                              | 1.50 (1.42-1.58)                             | 1.48 (1.37-1.59)                             | 1.29 (1.22-1.37)                                 | 1.54 (1.47-1.63)                             |

<sup>a</sup> Analyses included those within 30 miles of the nearest air monitoring station that measured PM<sub>2.5</sub> (N=3489595)  
<sup>b</sup> Analyses included those within 10 miles of the nearest air monitoring station that measured PM<sub>2.5</sub> (N=2077164)  
<sup>c</sup> Analyses included those with a history of PM<sub>2.5</sub> in the year prior to a time point in analysis during following up (N=4496047)  
<sup>d</sup> Analyses included those with a history of PM<sub>2.5</sub> exposure three years prior to baseline (N=3022654)  
<sup>e</sup> Analyses included those within 30 miles of the nearest air monitoring station that measured ozone (N=3558042)

**eTable 5:** Cause specific death associated with PM<sub>2.5</sub> in the contiguous US and by state

**eTable 5a:** Death due to non-accidental causes associated with PM<sub>2.5</sub> in the contiguous US and by state

| <b>Location</b> | <b>PM<sub>2.5</sub><br/>(<math>\mu\text{g}/\text{m}^3</math>)</b> | <b>PAF (%) (95% UI)</b> | <b>Number of deaths (95% UI)</b> | <b>Rate (per<br/>100,000) (95% UI)</b> | <b>Age-standardized<br/>rate (per 100,000)<br/>(95% UI)</b> |
|-----------------|-------------------------------------------------------------------|-------------------------|----------------------------------|----------------------------------------|-------------------------------------------------------------|
| Contiguous US   | 10.1                                                              | 7.8 (7.2-8.4)           | 197905.1 (183463.3-213644.9)     | 61.2 (56.7-66)                         | 51.4 (47.7-55.5)                                            |
| Alabama         | 11.6                                                              | 8.6 (8-9.3)             | 4198.4 (3918.7-4524.5)           | 86.1 (80.4-92.8)                       | 71.3 (66.6-76.9)                                            |
| Arizona         | 9.5                                                               | 7.4 (6.8-8)             | 3809.1 (3521.5-4120)             | 54.3 (50.2-58.7)                       | 43.9 (40.6-47.5)                                            |

|                      |      |               |                           |                  |                  |
|----------------------|------|---------------|---------------------------|------------------|------------------|
| Arkansas             | 10.3 | 8 (7.5-8.6)   | 2394.1 (2229-2592.3)      | 79.7 (74.2-86.3) | 65.1 (60.6-70.5) |
| California           | 12.2 | 8.7 (8.1-9.4) | 21469.6 (19996.9-23161.1) | 54.3 (50.6-58.6) | 49.3 (45.9-53.2) |
| Colorado             | 7.3  | 6 (5.4-6.5)   | 1996.3 (1814.2-2167.2)    | 35.6 (32.4-38.7) | 34.8 (31.6-37.7) |
| Connecticut          | 8.5  | 7 (6.4-7.5)   | 1997.9 (1844.1-2162)      | 55.7 (51.4-60.3) | 40.6 (37.5-44)   |
| Delaware             | 9.7  | 7.7 (7.2-8.3) | 645.3 (596.2-699.1)       | 67.1 (62-72.7)   | 51.4 (47.5-55.7) |
| District of Columbia | 9.7  | 7.7 (7.2-8.3) | 335.1 (309.9-363.4)       | 48.3 (44.7-52.4) | 49.2 (45.5-53.4) |
| Florida              | 7.6  | 6.3 (5.7-6.8) | 11662.3 (10630.2-12615.4) | 55.6 (50.7-60.1) | 37.3 (34-40.4)   |
| Georgia              | 11.0 | 8.3 (7.8-9)   | 6316.1 (5889.1-6818)      | 60.6 (56.5-65.4) | 60.3 (56.3-65.1) |
| Idaho                | 9.2  | 7.3 (6.8-7.9) | 923.8 (855.2-1003.1)      | 53.8 (49.8-58.4) | 48.4 (44.8-52.6) |
| Illinois             | 13.3 | 9.2 (8.6-9.9) | 9263 (8648.4-10001.8)     | 72.4 (67.6-78.1) | 60.4 (56.4-65.2) |
| Indiana              | 12.2 | 8.8 (8.2-9.5) | 5280.3 (4932-5695.4)      | 79.2 (74-85.4)   | 67.3 (62.9-72.6) |
| Iowa                 | 9.3  | 7.5 (6.9-8.1) | 2118.1 (1962.5-2286)      | 67.3 (62.4-72.7) | 50.3 (46.6-54.3) |
| Kansas               | 9.4  | 7.5 (7-8.1)   | 1853.7 (1715.6-1999.4)    | 63.6 (58.9-68.6) | 52.1 (48.2-56.2) |
| Kentucky             | 11.2 | 8.4 (7.9-9.1) | 3678.4 (3433.7-3978.8)    | 82.6 (77.1-89.3) | 69.8 (65.2-75.5) |
| Louisiana            | 9.2  | 7.5 (6.9-8.1) | 3095 (2871.9-3352.1)      | 66.1 (61.3-71.6) | 58.9 (54.6-63.8) |
| Maine                | 7.5  | 6.3 (5.8-6.8) | 842.2 (768.5-912.6)       | 63 (57.5-68.3)   | 42.9 (39.1-46.5) |
| Maryland             | 10.3 | 8 (7.5-8.6)   | 3573 (3323.7-3849.4)      | 59 (54.9-63.6)   | 50.8 (47.2-54.7) |
| Massachusetts        | 7.9  | 6.5 (6-7.1)   | 3536.7 (3243.4-3828.4)    | 51.6 (47.3-55.8) | 40.1 (36.8-43.4) |
| Michigan             | 10.7 | 8.1 (7.6-8.8) | 7270.3 (6775.5-7843.3)    | 73 (68-78.7)     | 57.3 (53.4-61.8) |
| Minnesota            | 7.9  | 6.6 (6-7.1)   | 2655.3 (2431.6-2879.6)    | 47.6 (43.6-51.6) | 38.9 (35.6-42.2) |
| Mississippi          | 10.1 | 7.9 (7.4-8.5) | 2344.4 (2186.6-2538.3)    | 78.6 (73.3-85.1) | 68.3 (63.7-74)   |
| Missouri             | 10.6 | 8.2 (7.6-8.8) | 4578.1 (4253.3-4936.4)    | 74.9 (69.6-80.7) | 59.5 (55.2-64.1) |
| Montana              | 7.1  | 5.8 (5.3-6.3) | 536.4 (484.5-579.8)       | 51.1 (46.1-55.2) | 39 (35.2-42.1)   |
| Nebraska             | 8.6  | 7 (6.5-7.6)   | 1099.2 (1010-1188.3)      | 57.2 (52.6-61.9) | 46.8 (43-50.5)   |
| Nevada               | 9.0  | 7.3 (6.7-7.8) | 1611.8 (1490.1-1740.2)    | 53.8 (49.7-58)   | 49.8 (46.1-53.8) |
| New Hampshire        | 7.5  | 6.3 (5.8-6.8) | 711.7 (647.1-772.1)       | 53 (48.2-57.5)   | 39.9 (36.2-43.3) |
| New Jersey           | 9.9  | 7.8 (7.2-8.4) | 5381.7 (5004.2-5802.8)    | 59.8 (55.6-64.4) | 47.2 (43.9-50.9) |
| New Mexico           | 6.7  | 5.6 (5-6)     | 916.5 (822.5-992.7)       | 43.9 (39.4-47.5) | 36.2 (32.5-39.2) |
| New York             | 9.4  | 7.5 (7-8.1)   | 10919.4 (10127.4-11785.3) | 55 (51-59.4)     | 43.3 (40.2-46.7) |

|                                                                                                                                     |      |               |                           |                  |                  |
|-------------------------------------------------------------------------------------------------------------------------------------|------|---------------|---------------------------|------------------|------------------|
| North Carolina                                                                                                                      | 10.3 | 8 (7.4-8.6)   | 6773.4 (6307.3-7321.8)    | 65.9 (61.4-71.3) | 56.4 (52.6-61)   |
| North Dakota                                                                                                                        | 6.0  | 4.8 (4.3-5.2) | 284.7 (251.4-309.6)       | 37.7 (33.3-41)   | 30.3 (26.8-33)   |
| Ohio                                                                                                                                | 12.0 | 8.7 (8.2-9.4) | 9769 (9122.8-10551.7)     | 83.8 (78.2-90.5) | 65.5 (61.2-70.8) |
| Oklahoma                                                                                                                            | 9.6  | 7.7 (7.1-8.3) | 2814 (2619.8-3044.1)      | 71.6 (66.6-77.4) | 62.1 (57.8-67.1) |
| Oregon                                                                                                                              | 8.6  | 7.1 (6.5-7.6) | 2362 (2174.9-2555.1)      | 57 (52.5-61.7)   | 45.7 (42.1-49.4) |
| Pennsylvania                                                                                                                        | 10.9 | 8.2 (7.7-8.9) | 10132.1 (9422.4-10933.4)  | 79.1 (73.6-85.4) | 56.3 (52.3-60.7) |
| Rhode Island                                                                                                                        | 7.1  | 6 (5.4-6.5)   | 553.1 (501.8-600.4)       | 52.2 (47.4-56.7) | 38.1 (34.5-41.3) |
| South Carolina                                                                                                                      | 10.0 | 7.9 (7.3-8.5) | 3539 (3294-3822.8)        | 70.4 (65.6-76.1) | 58.3 (54.3-63)   |
| South Dakota                                                                                                                        | 6.6  | 5.4 (4.8-5.8) | 387.8 (346.3-421.1)       | 44.6 (39.8-48.4) | 35 (31.3-38)     |
| Tennessee                                                                                                                           | 10.2 | 8 (7.4-8.6)   | 5083.7 (4728.6-5485)      | 75.7 (70.4-81.7) | 64.3 (59.8-69.3) |
| Texas                                                                                                                               | 10.3 | 8 (7.4-8.6)   | 14508.4 (13486.9-15653.8) | 51.3 (47.6-55.3) | 54 (50.2-58.3)   |
| Utah                                                                                                                                | 7.6  | 6.3 (5.8-6.8) | 1005.3 (917.4-1085.3)     | 32.4 (29.6-35)   | 39.5 (36.1-42.7) |
| Vermont                                                                                                                             | 6.9  | 5.7 (5.2-6.2) | 312.5 (281.3-340.7)       | 50.1 (45.1-54.6) | 36.3 (32.6-39.6) |
| Virginia                                                                                                                            | 8.9  | 7.3 (6.7-7.9) | 4580 (4236.2-4947.8)      | 54.1 (50-58.4)   | 47.7 (44.1-51.5) |
| Washington                                                                                                                          | 7.9  | 6.5 (6-7.1)   | 3381 (3099.3-3659.7)      | 45.7 (41.9-49.4) | 40.6 (37.2-43.9) |
| West Virginia                                                                                                                       | 9.8  | 7.7 (7.2-8.4) | 1609.9 (1499.2-1743.2)    | 88.7 (82.6-96)   | 63.9 (59.5-69.2) |
| Wisconsin                                                                                                                           | 9.8  | 7.7 (7.1-8.3) | 3652.8 (3389.6-3944.7)    | 63 (58.5-68.1)   | 49.2 (45.7-53.2) |
| Wyoming                                                                                                                             | 4.7  | 3.4 (2.9-3.7) | 143.1 (121.7-155.9)       | 24.7 (21-26.9)   | 21.1 (18-23)     |
| Abbreviations: PM <sub>2.5</sub> , ambient fine particulate matter; PAF, population attributable fraction; UI, uncertainty interval |      |               |                           |                  |                  |

**eTable 5b:** Death due to non-communicable diseases associated with PM<sub>2.5</sub> in the contiguous US and by state

| Location      | PM <sub>2.5</sub><br>(µg/m <sup>3</sup> ) | PAF (%) (95% UI) | Number of deaths (95% UI)    | Rate (per<br>100,000) (95% UI) | Age-standardized<br>rate (per 100,000)<br>(95% UI) |
|---------------|-------------------------------------------|------------------|------------------------------|--------------------------------|----------------------------------------------------|
| Contiguous US | 10.1                                      | 7.7 (7.1-8.5)    | 188540.3 (173883.7-209786.3) | 58.3 (53.7-64.8)               | 48.8 (45.1-54.3)                                   |
| Alabama       | 11.6                                      | 8.5 (7.9-9.4)    | 3989.9 (3697.9-4453.5)       | 81.8 (75.9-91.4)               | 67.6 (62.6-75.4)                                   |
| Arizona       | 9.5                                       | 7.3 (6.7-8.1)    | 3645 (3343.9-4090.8)         | 52 (47.7-58.3)                 | 41.9 (38.4-47)                                     |
| Arkansas      | 10.3                                      | 7.9 (7.3-8.8)    | 2287.5 (2122.5-2550.9)       | 76.1 (70.7-84.9)               | 62 (57.5-69.1)                                     |
| California    | 12.2                                      | 8.6 (7.9-9.5)    | 20604.2 (19065.1-22898.3)    | 52.1 (48.2-57.9)               | 47.3 (43.7-52.5)                                   |

|                      |      |                |                           |                  |                  |
|----------------------|------|----------------|---------------------------|------------------|------------------|
| Colorado             | 7.3  | 5.9 (5.3-6.6)  | 1903.9 (1716.5-2115.6)    | 34 (30.6-37.7)   | 33.1 (29.9-36.8) |
| Connecticut          | 8.5  | 6.9 (6.3-7.7)  | 1898.4 (1738-2117)        | 52.9 (48.4-59)   | 38.4 (35.2-42.8) |
| Delaware             | 9.7  | 7.6 (7-8.5)    | 616.3 (567.9-693.6)       | 64.1 (59-72.1)   | 48.9 (45.1-55.1) |
| District of Columbia | 9.7  | 7.6 (7.1-8.5)  | 310.8 (286.8-349.2)       | 44.8 (41.3-50.3) | 45.7 (42.1-51.3) |
| Florida              | 7.6  | 6.2 (5.6-6.9)  | 11153.1 (10093.9-12441.7) | 53.1 (48.1-59.3) | 35.4 (32-39.5)   |
| Georgia              | 11.0 | 8.2 (7.6-9.1)  | 5964.2 (5537.2-6667.7)    | 57.2 (53.1-63.9) | 57 (52.9-63.7)   |
| Idaho                | 9.2  | 7.2 (6.6-8)    | 887.9 (814.3-989.2)       | 51.7 (47.4-57.6) | 46.5 (42.6-51.8) |
| Illinois             | 13.3 | 9.1 (8.4-10.1) | 8819.2 (8183.9-9809.2)    | 68.9 (63.9-76.6) | 57.3 (53.2-63.8) |
| Indiana              | 12.2 | 8.7 (8.1-9.7)  | 5004.2 (4637.2-5568.5)    | 75.1 (69.6-83.5) | 63.6 (58.9-70.8) |
| Iowa                 | 9.3  | 7.4 (6.8-8.2)  | 2035.4 (1876.6-2279.4)    | 64.7 (59.7-72.5) | 48.2 (44.4-54)   |
| Kansas               | 9.4  | 7.4 (6.8-8.3)  | 1773.9 (1633.3-1984.9)    | 60.9 (56.1-68.1) | 49.7 (45.8-55.6) |
| Kentucky             | 11.2 | 8.3 (7.7-9.3)  | 3485 (3227-3906.3)        | 78.2 (72.4-87.7) | 66 (61.1-74)     |
| Louisiana            | 9.2  | 7.4 (6.8-8.2)  | 2918.1 (2690.2-3252)      | 62.3 (57.4-69.4) | 55.4 (51.1-61.8) |
| Maine                | 7.5  | 6.2 (5.7-7)    | 812.1 (736-904.5)         | 60.8 (55.1-67.7) | 41.1 (37.3-45.8) |
| Maryland             | 10.3 | 7.9 (7.3-8.8)  | 3372.1 (3123.8-3756.9)    | 55.7 (51.6-62.1) | 47.8 (44.3-53.2) |
| Massachusetts        | 7.9  | 6.5 (5.9-7.2)  | 3381.9 (3074-3773.3)      | 49.3 (44.8-55)   | 38.2 (34.7-42.6) |
| Michigan             | 10.7 | 8 (7.4-8.9)    | 6963.3 (6449.2-7751.7)    | 69.9 (64.7-77.8) | 54.7 (50.6-60.9) |
| Minnesota            | 7.9  | 6.5 (5.9-7.2)  | 2550.6 (2321.1-2831.6)    | 45.7 (41.6-50.8) | 37.2 (33.9-41.3) |
| Mississippi          | 10.1 | 7.8 (7.2-8.7)  | 2223.5 (2055.1-2479.8)    | 74.5 (68.9-83.1) | 64.6 (59.7-72.1) |
| Missouri             | 10.6 | 8.1 (7.5-9)    | 4377.8 (4060.6-4865.2)    | 71.6 (66.4-79.6) | 56.7 (52.6-63)   |
| Montana              | 7.1  | 5.7 (5.2-6.4)  | 514.4 (461.7-579.7)       | 49 (44-55.2)     | 37.3 (33.5-42)   |
| Nebraska             | 8.6  | 6.9 (6.3-7.7)  | 1055 (963.8-1165.6)       | 54.9 (50.2-60.7) | 44.8 (40.9-49.5) |
| Nevada               | 9.0  | 7.2 (6.6-8)    | 1546 (1420.7-1712.3)      | 51.6 (47.4-57.1) | 47.7 (43.9-52.9) |
| New Hampshire        | 7.5  | 6.2 (5.7-7)    | 683.3 (619.7-758.6)       | 50.9 (46.2-56.5) | 38.1 (34.6-42.3) |
| New Jersey           | 9.9  | 7.7 (7.1-8.6)  | 5074.9 (4692.5-5642.3)    | 56.4 (52.1-62.7) | 44.4 (41-49.3)   |
| New Mexico           | 6.7  | 5.5 (4.9-6.1)  | 874.8 (781.1-975.3)       | 41.9 (37.4-46.7) | 34.5 (30.8-38.4) |
| New York             | 9.4  | 7.4 (6.9-8.3)  | 10410 (9603.9-11620.1)    | 52.4 (48.4-58.5) | 41.1 (38-45.9)   |
| North Carolina       | 10.3 | 7.9 (7.3-8.8)  | 6429.4 (5952.9-7171.8)    | 62.6 (57.9-69.8) | 53.4 (49.5-59.6) |
| North Dakota         | 6.0  | 4.8 (4.2-5.3)  | 273 (238-307.6)           | 36.1 (31.5-40.7) | 29 (25.3-32.7)   |

|                                                                                                                                     |      |               |                           |                  |                  |
|-------------------------------------------------------------------------------------------------------------------------------------|------|---------------|---------------------------|------------------|------------------|
| Ohio                                                                                                                                | 12.0 | 8.6 (8-9.6)   | 9307.9 (8646.2-10368.1)   | 79.8 (74.2-88.9) | 62.2 (57.7-69.2) |
| Oklahoma                                                                                                                            | 9.6  | 7.6 (7-8.4)   | 2689.7 (2483.9-3008.7)    | 68.4 (63.2-76.5) | 59.2 (54.7-66.2) |
| Oregon                                                                                                                              | 8.6  | 7 (6.4-7.8)   | 2266.7 (2084-2523.3)      | 54.7 (50.3-60.9) | 43.7 (40.2-48.7) |
| Pennsylvania                                                                                                                        | 10.9 | 8.1 (7.5-9.1) | 9647.6 (8919.4-10749.5)   | 75.3 (69.7-83.9) | 53.3 (49.3-59.4) |
| Rhode Island                                                                                                                        | 7.1  | 5.9 (5.3-6.6) | 531.1 (477.2-593.9)       | 50.1 (45-56)     | 36.3 (32.6-40.6) |
| South Carolina                                                                                                                      | 10.0 | 7.8 (7.2-8.7) | 3359.8 (3107.9-3757.1)    | 66.9 (61.9-74.8) | 55.2 (51.1-61.7) |
| South Dakota                                                                                                                        | 6.6  | 5.3 (4.7-5.9) | 369.3 (330.2-407.5)       | 42.5 (38-46.9)   | 33.2 (29.7-36.6) |
| Tennessee                                                                                                                           | 10.2 | 7.9 (7.3-8.8) | 4846.1 (4485.3-5417.3)    | 72.2 (66.8-80.7) | 61.1 (56.5-68.3) |
| Texas                                                                                                                               | 10.3 | 7.9 (7.3-8.8) | 13652.6 (12615.5-15162.3) | 48.2 (44.6-53.6) | 51 (47.1-56.6)   |
| Utah                                                                                                                                | 7.6  | 6.2 (5.7-7)   | 951 (860.6-1068.2)        | 30.7 (27.7-34.4) | 37.6 (34-42.2)   |
| Vermont                                                                                                                             | 6.9  | 5.7 (5.1-6.3) | 301.7 (267.8-337.2)       | 48.4 (42.9-54.1) | 34.9 (31-39)     |
| Virginia                                                                                                                            | 8.9  | 7.2 (6.6-8)   | 4347.2 (3988.1-4857.5)    | 51.3 (47.1-57.3) | 45.2 (41.5-50.5) |
| Washington                                                                                                                          | 7.9  | 6.5 (5.9-7.2) | 3244.8 (2953.3-3609.5)    | 43.8 (39.9-48.7) | 38.9 (35.4-43.3) |
| West Virginia                                                                                                                       | 9.8  | 7.6 (7.1-8.5) | 1539.5 (1426.7-1696.5)    | 84.8 (78.6-93.4) | 60.8 (56.3-67)   |
| Wisconsin                                                                                                                           | 9.8  | 7.6 (7-8.4)   | 3508.9 (3237.2-3903.3)    | 60.5 (55.9-67.4) | 47.1 (43.4-52.4) |
| Wyoming                                                                                                                             | 4.7  | 3.3 (2.8-3.7) | 137.2 (116.4-153.3)       | 23.7 (20.1-26.5) | 20.2 (17.2-22.6) |
| Abbreviations: PM <sub>2.5</sub> , ambient fine particulate matter; PAF, population attributable fraction; UI, uncertainty interval |      |               |                           |                  |                  |

**eTable 5c:** Death due to cardiovascular disease associated with PM<sub>2.5</sub> in the contiguous US and by state

| Location      | PM <sub>2.5</sub><br>(µg/m <sup>3</sup> ) | PAF (%) (95% UI) | Number of deaths (95% UI) | Rate (per<br>100,000) (95% UI) | Age-standardized<br>rate (per 100,000)<br>(95% UI) |
|---------------|-------------------------------------------|------------------|---------------------------|--------------------------------|----------------------------------------------------|
| Contiguous US | 10.1                                      | 12.6 (11.7-13.5) | 56070.1 (51940.2-60318.3) | 17.3 (16.1-18.6)               | 14.4 (13.3-15.5)                                   |
| Alabama       | 11.6                                      | 14.9 (13.8-16)   | 1113.4 (1020.5-1202.1)    | 22.8 (20.9-24.7)               | 18.9 (17.3-20.4)                                   |
| Arizona       | 9.5                                       | 11.7 (10.8-12.5) | 1012.2 (932.5-1093.5)     | 14.4 (13.3-15.6)               | 11.5 (10.6-12.4)                                   |
| Arkansas      | 10.3                                      | 12.9 (12-13.9)   | 794.4 (732.8-858.8)       | 26.4 (24.4-28.6)               | 21.3 (19.7-23)                                     |

|                      |      |                  |                        |                  |                  |
|----------------------|------|------------------|------------------------|------------------|------------------|
| California           | 12.2 | 15.7 (14.6-16.8) | 7119.3 (6601.7-7659)   | 18 (16.7-19.4)   | 16.2 (15-17.4)   |
| Colorado             | 7.3  | 8.3 (7.6-8.9)    | 367.6 (337.3-398.8)    | 6.6 (6-7.1)      | 6.4 (5.8-6.9)    |
| Connecticut          | 8.5  | 10.2 (9.5-11)    | 488.3 (446.7-530)      | 13.6 (12.5-14.8) | 9.6 (8.8-10.5)   |
| Delaware             | 9.7  | 12 (11.2-13)     | 158 (142.7-172.4)      | 16.4 (14.8-17.9) | 12.4 (11.2-13.5) |
| District of Columbia | 9.7  | 12.1 (11.2-13)   | 93.3 (83.1-103.3)      | 13.4 (12-14.9)   | 13.9 (12.3-15.4) |
| Florida              | 7.6  | 8.7 (8.1-9.4)    | 2900.8 (2671.3-3137.5) | 13.8 (12.7-15)   | 9 (8.3-9.7)      |
| Georgia              | 11.0 | 14 (12.9-15)     | 1553.7 (1436.3-1680.4) | 14.9 (13.8-16.1) | 15 (13.8-16.2)   |
| Idaho                | 9.2  | 11.3 (10.5-12.2) | 232.8 (210.2-253)      | 13.6 (12.2-14.7) | 12.2 (11-13.3)   |
| Illinois             | 13.3 | 17.4 (16.1-18.6) | 2953.9 (2712.2-3178.9) | 23.1 (21.2-24.8) | 19 (17.4-20.4)   |
| Indiana              | 12.2 | 15.8 (14.7-17)   | 1581.3 (1458.8-1713)   | 23.7 (21.9-25.7) | 20 (18.4-21.6)   |
| Iowa                 | 9.3  | 11.4 (10.6-12.3) | 577.5 (529.6-623.4)    | 18.4 (16.8-19.8) | 13.4 (12.3-14.5) |
| Kansas               | 9.4  | 11.6 (10.7-12.5) | 473.2 (435-512.1)      | 16.2 (14.9-17.6) | 13 (12-14.1)     |
| Kentucky             | 11.2 | 14.4 (13.3-15.4) | 1004.1 (926.1-1085.8)  | 22.5 (20.8-24.4) | 18.9 (17.5-20.5) |
| Louisiana            | 9.2  | 11.4 (10.5-12.3) | 830.7 (759.5-897.9)    | 17.7 (16.2-19.2) | 15.8 (14.4-17)   |
| Maine                | 7.5  | 8.7 (8-9.4)      | 166.6 (152.1-182.4)    | 12.5 (11.4-13.7) | 8.3 (7.6-9.1)    |
| Maryland             | 10.3 | 12.9 (12-13.9)   | 974.1 (895.2-1055.3)   | 16.1 (14.8-17.4) | 13.7 (12.6-14.9) |
| Massachusetts        | 7.9  | 9.2 (8.5-9.9)    | 756.5 (694.9-818.4)    | 11 (10.1-11.9)   | 8.4 (7.7-9)      |
| Michigan             | 10.7 | 13.5 (12.5-14.5) | 2498.2 (2313.6-2693.4) | 25.1 (23.2-27)   | 19.3 (17.9-20.9) |
| Minnesota            | 7.9  | 9.3 (8.6-10)     | 494 (452.3-535.2)      | 8.9 (8.1-9.6)    | 7.2 (6.5-7.7)    |
| Mississippi          | 10.1 | 12.7 (11.7-13.6) | 649.2 (595.5-702.8)    | 21.8 (20-23.6)   | 18.9 (17.3-20.4) |
| Missouri             | 10.6 | 13.5 (12.5-14.5) | 1429.2 (1321.3-1536.6) | 23.4 (21.6-25.1) | 18.4 (17-19.7)   |
| Montana              | 7.1  | 7.9 (7.3-8.5)    | 122.2 (110.9-133.4)    | 11.6 (10.6-12.7) | 8.7 (7.9-9.5)    |
| Nebraska             | 8.6  | 10.4 (9.6-11.2)  | 243.2 (222.1-264.6)    | 12.7 (11.6-13.8) | 10.1 (9.2-11)    |
| Nevada               | 9.0  | 10.9 (10.1-11.8) | 432.2 (395.5-468.7)    | 14.4 (13.2-15.6) | 13.4 (12.3-14.6) |
| New Hampshire        | 7.5  | 8.7 (8-9.4)      | 163.2 (147.9-179)      | 12.2 (11-13.3)   | 9 (8.1-9.8)      |
| New Jersey           | 9.9  | 12.4 (11.4-13.3) | 1600.4 (1476.4-1729.6) | 17.8 (16.4-19.2) | 13.7 (12.7-14.8) |
| New Mexico           | 6.7  | 7.4 (6.8-7.9)    | 223.6 (204.4-243.9)    | 10.7 (9.8-11.7)  | 8.6 (7.9-9.4)    |
| New York             | 9.4  | 11.7 (10.8-12.6) | 3858.8 (3571.7-4162.7) | 19.4 (18-21)     | 14.9 (13.8-16.1) |
| North Carolina       | 10.3 | 12.9 (12-13.9)   | 1690.6 (1557.5-1828.5) | 16.5 (15.2-17.8) | 14 (12.9-15.1)   |

|                                                                                                                                     |      |                  |                        |                  |                  |
|-------------------------------------------------------------------------------------------------------------------------------------|------|------------------|------------------------|------------------|------------------|
| North Dakota                                                                                                                        | 6.0  | 6.1 (5.7-6.6)    | 57.9 (51.9-63.7)       | 7.7 (6.9-8.4)    | 6 (5.4-6.6)      |
| Ohio                                                                                                                                | 12.0 | 15.5 (14.3-16.6) | 2940.2 (2720.1-3179.3) | 25.2 (23.3-27.3) | 19.4 (18-21)     |
| Oklahoma                                                                                                                            | 9.6  | 12 (11.1-12.9)   | 807.1 (744.6-875.6)    | 20.5 (18.9-22.3) | 17.7 (16.3-19.2) |
| Oregon                                                                                                                              | 8.6  | 10.4 (9.6-11.2)  | 459.3 (419.9-498.2)    | 11.1 (10.1-12)   | 8.8 (8.1-9.6)    |
| Pennsylvania                                                                                                                        | 10.9 | 13.8 (12.8-14.8) | 3100.1 (2872.8-3340.5) | 24.2 (22.4-26.1) | 16.8 (15.5-18.1) |
| Rhode Island                                                                                                                        | 7.1  | 8 (7.4-8.7)      | 141.3 (127.8-154.4)    | 13.3 (12.1-14.6) | 9.4 (8.5-10.2)   |
| South Carolina                                                                                                                      | 10.0 | 12.6 (11.6-13.5) | 849.8 (779.2-920.4)    | 16.9 (15.5-18.3) | 13.9 (12.7-15.1) |
| South Dakota                                                                                                                        | 6.6  | 7.1 (6.6-7.7)    | 83.8 (75.2-92.4)       | 9.6 (8.7-10.6)   | 7.3 (6.6-8.1)    |
| Tennessee                                                                                                                           | 10.2 | 12.9 (11.9-13.9) | 1455.4 (1342.4-1570.7) | 21.7 (20-23.4)   | 18.2 (16.8-19.7) |
| Texas                                                                                                                               | 10.3 | 13 (12.1-14)     | 4051.2 (3736.4-4366.2) | 14.3 (13.2-15.4) | 15.1 (13.9-16.3) |
| Utah                                                                                                                                | 7.6  | 8.9 (8.2-9.5)    | 231.1 (212.1-251.4)    | 7.5 (6.8-8.1)    | 9.3 (8.5-10.1)   |
| Vermont                                                                                                                             | 6.9  | 7.6 (7.1-8.2)    | 68.4 (61.3-75.2)       | 11 (9.8-12.1)    | 7.8 (7-8.5)      |
| Virginia                                                                                                                            | 8.9  | 10.9 (10.1-11.8) | 1096.2 (1007.6-1185.3) | 12.9 (11.9-14)   | 11.3 (10.4-12.3) |
| Washington                                                                                                                          | 7.9  | 9.3 (8.6-10)     | 689.4 (632.7-747.8)    | 9.3 (8.5-10.1)   | 8.2 (7.5-8.9)    |
| West Virginia                                                                                                                       | 9.8  | 12.2 (11.3-13.1) | 460.1 (419.9-498.8)    | 25.3 (23.1-27.5) | 18.1 (16.5-19.6) |
| Wisconsin                                                                                                                           | 9.8  | 12.1 (11.2-13.1) | 994.2 (916.4-1078)     | 17.2 (15.8-18.6) | 13.2 (12.1-14.3) |
| Wyoming                                                                                                                             | 4.7  | 4.1 (3.8-4.4)    | 28.2 (25.2-31.6)       | 4.9 (4.4-5.4)    | 4.2 (3.7-4.7)    |
| Abbreviations: PM <sub>2.5</sub> , ambient fine particulate matter; PAF, population attributable fraction; UI, uncertainty interval |      |                  |                        |                  |                  |

**eTable 5d:** Death due to cerebrovascular disease associated with PM<sub>2.5</sub> in the contiguous US and by state

| Location      | PM <sub>2.5</sub><br>( $\mu\text{g}/\text{m}^3$ ) | PAF (%) (95% UI) | Number of deaths (95% UI) | Rate (per<br>100,000) (95% UI) | Age-standardized<br>rate (per 100,000)<br>(95% UI) |
|---------------|---------------------------------------------------|------------------|---------------------------|--------------------------------|----------------------------------------------------|
| Contiguous US | 10.1                                              | 27.8 (15-31.9)   | 40466.1 (21770.1-46487.9) | 12.5 (6.7-14.4)                | 10.6 (5.7-12.1)                                    |
| Alabama       | 11.6                                              | 30.3 (16.9-34.8) | 888.7 (498.4-1023.4)      | 18.2 (10.2-21)                 | 15.2 (8.5-17.5)                                    |
| Arizona       | 9.5                                               | 26.7 (14.3-30.7) | 714.5 (376.1-824.8)       | 10.2 (5.4-11.8)                | 8.2 (4.3-9.5)                                      |



|                      |      |                  |                        |                 |                 |
|----------------------|------|------------------|------------------------|-----------------|-----------------|
| Arkansas             | 10.3 | 28.5 (15.4-32.8) | 460.3 (249.8-532.7)    | 15.3 (8.3-17.7) | 12.5 (6.8-14.5) |
| California           | 12.2 | 30.7 (17.6-35.2) | 5024.4 (2883.8-5734.9) | 12.7 (7.3-14.5) | 11.5 (6.6-13.2) |
| Colorado             | 7.3  | 22.3 (11.5-25.8) | 443.7 (228-511.9)      | 7.9 (4.1-9.1)   | 8 (4.1-9.2)     |
| Connecticut          | 8.5  | 25.4 (13.5-29.2) | 355.7 (187.8-412.1)    | 9.9 (5.2-11.5)  | 7 (3.7-8.2)     |
| Delaware             | 9.7  | 27.6 (14.9-31.7) | 157.7 (84.1-185)       | 16.4 (8.7-19.2) | 12.8 (6.8-15)   |
| District of Columbia | 9.7  | 27.6 (14.9-31.8) | 67.9 (36.2-81.9)       | 9.8 (5.2-11.8)  | 9.9 (5.3-12)    |
| Florida              | 7.6  | 23.3 (12.1-26.9) | 2936.6 (1529.2-3396.1) | 14 (7.3-16.2)   | 9.1 (4.7-10.5)  |
| Georgia              | 11.0 | 29.5 (16.1-33.9) | 1299.4 (718-1492.9)    | 12.5 (6.9-14.3) | 12.8 (7.1-14.8) |
| Idaho                | 9.2  | 26.4 (14.1-30.4) | 191.8 (100.8-223.4)    | 11.2 (5.9-13)   | 10.2 (5.4-11.8) |
| Illinois             | 13.3 | 32.3 (19.3-37)   | 1944.7 (1146.9-2232.4) | 15.2 (9-17.4)   | 12.6 (7.4-14.4) |
| Indiana              | 12.2 | 31.2 (17.9-35.7) | 980.6 (557.3-1129)     | 14.7 (8.4-16.9) | 12.5 (7.1-14.4) |
| Iowa                 | 9.3  | 26.9 (14.4-30.9) | 380.8 (198.6-443.2)    | 12.1 (6.3-14.1) | 8.8 (4.6-10.3)  |
| Kansas               | 9.4  | 27 (14.5-31)     | 365.7 (192.6-427.9)    | 12.6 (6.6-14.7) | 10.2 (5.4-11.9) |
| Kentucky             | 11.2 | 29.8 (16.4-34.2) | 611.5 (345.9-704.1)    | 13.7 (7.8-15.8) | 11.8 (6.7-13.5) |
| Louisiana            | 9.2  | 26.8 (14.4-30.8) | 659.8 (351.9-762.3)    | 14.1 (7.5-16.3) | 12.7 (6.8-14.7) |
| Maine                | 7.5  | 23.4 (12.1-27)   | 172 (89-202.6)         | 12.9 (6.7-15.2) | 8.8 (4.5-10.3)  |
| Maryland             | 10.3 | 28.5 (15.4-32.7) | 804.3 (442.1-929.8)    | 13.3 (7.3-15.4) | 11.5 (6.3-13.3) |
| Massachusetts        | 7.9  | 24.1 (12.6-27.7) | 569.5 (294.6-663.6)    | 8.3 (4.3-9.7)   | 6.4 (3.3-7.5)   |
| Michigan             | 10.7 | 28.9 (15.8-33.2) | 1447.6 (791.2-1663.9)  | 14.5 (7.9-16.7) | 11.4 (6.2-13.1) |
| Minnesota            | 7.9  | 24.1 (12.6-27.8) | 541.3 (283.4-629)      | 9.7 (5.1-11.3)  | 7.9 (4.1-9.1)   |
| Mississippi          | 10.1 | 28.2 (15.2-32.4) | 486.2 (259.7-561.8)    | 16.3 (8.7-18.8) | 14.4 (7.7-16.7) |
| Missouri             | 10.6 | 29 (15.8-33.3)   | 916.5 (504.1-1053.7)   | 15 (8.2-17.2)   | 11.9 (6.5-13.7) |
| Montana              | 7.1  | 21.9 (11.2-25.3) | 106.5 (55.3-126.2)     | 10.1 (5.3-12)   | 7.8 (4-9.2)     |
| Nebraska             | 8.6  | 25.4 (13.6-29.3) | 193.4 (99.2-224.9)     | 10.1 (5.2-11.7) | 8 (4.1-9.3)     |
| Nevada               | 9.0  | 26.2 (14-30.2)   | 297.9 (161-346.2)      | 9.9 (5.4-11.5)  | 9.4 (5.1-10.9)  |
| New Hampshire        | 7.5  | 23.4 (12.1-27)   | 120.1 (61.9-142.7)     | 8.9 (4.6-10.6)  | 6.8 (3.5-8)     |
| New Jersey           | 9.9  | 27.9 (15-32)     | 969.3 (512.4-1117.7)   | 10.8 (5.7-12.4) | 8.4 (4.4-9.7)   |
| New Mexico           | 6.7  | 21.1 (10.8-24.5) | 185.4 (95.9-217.9)     | 8.9 (4.6-10.4)  | 7.3 (3.8-8.6)   |
| New York             | 9.4  | 27.1 (14.5-31.1) | 1698.5 (901.5-1962.3)  | 8.6 (4.5-9.9)   | 6.7 (3.5-7.7)   |

|                                                                                                                                     |      |                  |                        |                 |                 |
|-------------------------------------------------------------------------------------------------------------------------------------|------|------------------|------------------------|-----------------|-----------------|
| North Carolina                                                                                                                      | 10.3 | 28.5 (15.4-32.7) | 1451.8 (804.9-1674.1)  | 14.1 (7.8-16.3) | 12.3 (6.8-14.1) |
| North Dakota                                                                                                                        | 6.0  | 18.9 (9.4-22)    | 63.7 (32-75.5)         | 8.4 (4.2-10)    | 6.7 (3.4-8)     |
| Ohio                                                                                                                                | 12.0 | 30.9 (17.5-35.4) | 1982.2 (1111.6-2275.3) | 17 (9.5-19.5)   | 13.2 (7.4-15.2) |
| Oklahoma                                                                                                                            | 9.6  | 27.5 (14.8-31.6) | 534.5 (292.7-615.5)    | 13.6 (7.4-15.7) | 11.9 (6.5-13.7) |
| Oregon                                                                                                                              | 8.6  | 25.6 (13.7-29.5) | 529.4 (283.9-611.3)    | 12.8 (6.9-14.8) | 10.2 (5.5-11.8) |
| Pennsylvania                                                                                                                        | 10.9 | 29.3 (16-33.6)   | 1961.6 (1068.6-2257.1) | 15.3 (8.3-17.6) | 10.7 (5.8-12.3) |
| Rhode Island                                                                                                                        | 7.1  | 22.3 (11.4-25.8) | 94.9 (48.6-112.7)      | 9 (4.6-10.6)    | 6.6 (3.4-7.8)   |
| South Carolina                                                                                                                      | 10.0 | 28.1 (15.2-32.3) | 757.6 (410.7-877.1)    | 15.1 (8.2-17.5) | 12.6 (6.8-14.6) |
| South Dakota                                                                                                                        | 6.6  | 20.5 (10.4-23.7) | 84.8 (42.8-101.2)      | 9.8 (4.9-11.6)  | 7.5 (3.8-9)     |
| Tennessee                                                                                                                           | 10.2 | 28.5 (15.4-32.7) | 1001.4 (540.7-1152.3)  | 14.9 (8.1-17.2) | 12.8 (6.9-14.7) |
| Texas                                                                                                                               | 10.3 | 28.5 (15.4-32.7) | 3074.8 (1665.5-3534.6) | 10.9 (5.9-12.5) | 11.8 (6.4-13.5) |
| Utah                                                                                                                                | 7.6  | 23.4 (12.2-26.9) | 207.2 (108.9-243.4)    | 6.7 (3.5-7.8)   | 8.5 (4.4-9.9)   |
| Vermont                                                                                                                             | 6.9  | 21.6 (11-25)     | 53.7 (26-63.9)         | 8.6 (4.2-10.3)  | 6.2 (3-7.4)     |
| Virginia                                                                                                                            | 8.9  | 26.3 (14.1-30.2) | 935.5 (494-1081)       | 11 (5.8-12.8)   | 9.9 (5.2-11.4)  |
| Washington                                                                                                                          | 7.9  | 24.1 (12.6-27.7) | 728.8 (377.3-846.1)    | 9.8 (5.1-11.4)  | 8.9 (4.6-10.3)  |
| West Virginia                                                                                                                       | 9.8  | 27.7 (14.9-31.8) | 293.2 (154.8-343.3)    | 16.1 (8.5-18.9) | 11.6 (6.1-13.6) |
| Wisconsin                                                                                                                           | 9.8  | 27.5 (14.8-31.6) | 691.5 (368.6-793.7)    | 11.9 (6.4-13.7) | 9.2 (4.9-10.6)  |
| Wyoming                                                                                                                             | 4.7  | 14.1 (6.7-16.5)  | 26.9 (12.1-33.3)       | 4.6 (2.1-5.7)   | 4 (1.8-5)       |
| Abbreviations: PM <sub>2.5</sub> , ambient fine particulate matter; PAF, population attributable fraction; UI, uncertainty interval |      |                  |                        |                 |                 |

**eTable 5e:** Death due to chronic kidney disease associated with PM<sub>2.5</sub> in the contiguous US and by state

| Location      | PM <sub>2.5</sub><br>(µg/m <sup>3</sup> ) | PAF (%) (95% UI) | Number of deaths (95% UI) | Rate (per<br>100,000) (95% UI) | Age-standardized<br>rate (per<br>100,000) (95% UI) |
|---------------|-------------------------------------------|------------------|---------------------------|--------------------------------|----------------------------------------------------|
| Contiguous US | 10.1                                      | 17.1 (14-19.9)   | 7175.2 (5910.2-8371.9)    | 2.2 (1.8-2.6)                  | 1.9 (1.5-2.2)                                      |
| Alabama       | 11.6                                      | 19.3 (16.2-22.4) | 157.4 (129.2-184.3)       | 3.2 (2.6-3.8)                  | 2.6 (2.2-3.1)                                      |

|                      |      |                  |                     |               |               |
|----------------------|------|------------------|---------------------|---------------|---------------|
| Arizona              | 9.5  | 16.2 (13.1-18.9) | 70.3 (55.5-83.7)    | 1 (0.8-1.2)   | 0.8 (0.6-1)   |
| Arkansas             | 10.3 | 17.9 (14.9-20.8) | 105.4 (85.4-125.4)  | 3.5 (2.8-4.2) | 2.9 (2.3-3.4) |
| California           | 12.2 | 19.4 (16.2-22.5) | 690.7 (575.2-804.8) | 1.7 (1.5-2)   | 1.6 (1.3-1.8) |
| Colorado             | 7.3  | 12.2 (9.3-14.7)  | 49.9 (36.9-61.8)    | 0.9 (0.7-1.1) | 0.9 (0.6-1.1) |
| Connecticut          | 8.5  | 15 (11.9-17.7)   | 71 (55.2-85.4)      | 2 (1.5-2.4)   | 1.4 (1.1-1.7) |
| Delaware             | 9.7  | 17.1 (14-19.9)   | 30.1 (23.2-36.9)    | 3.1 (2.4-3.8) | 2.4 (1.8-2.9) |
| District of Columbia | 9.7  | 17.2 (14-20)     | 10 (7-13.2)         | 1.4 (1-1.9)   | 1.5 (1-2)     |
| Florida              | 7.6  | 13 (9.9-15.6)    | 332.7 (254.1-402.4) | 1.6 (1.2-1.9) | 1.1 (0.8-1.3) |
| Georgia              | 11.0 | 18.7 (15.6-21.7) | 304.5 (251.6-358.5) | 2.9 (2.4-3.4) | 2.9 (2.4-3.4) |
| Idaho                | 9.2  | 15.9 (12.8-18.6) | 22.6 (17.3-28.3)    | 1.3 (1-1.6)   | 1.2 (0.9-1.5) |
| Illinois             | 13.3 | 20.7 (17.5-23.9) | 443.2 (369.5-513.8) | 3.5 (2.9-4)   | 2.9 (2.4-3.4) |
| Indiana              | 12.2 | 20 (16.7-23)     | 227.5 (189.7-262.7) | 3.4 (2.8-3.9) | 2.9 (2.4-3.4) |
| Iowa                 | 9.3  | 16.5 (13.3-19.2) | 51.3 (40-63.2)      | 1.6 (1.3-2)   | 1.2 (1-1.5)   |
| Kansas               | 9.4  | 16.5 (13.4-19.3) | 71.8 (56.1-85.7)    | 2.5 (1.9-2.9) | 2 (1.6-2.4)   |
| Kentucky             | 11.2 | 18.9 (15.8-21.9) | 145.1 (119.1-168.9) | 3.3 (2.7-3.8) | 2.8 (2.3-3.2) |
| Louisiana            | 9.2  | 16.4 (13.3-19.2) | 149.1 (120.4-175.9) | 3.2 (2.6-3.8) | 2.9 (2.3-3.4) |
| Maine                | 7.5  | 13.1 (10-15.7)   | 30.3 (22.4-37.6)    | 2.3 (1.7-2.8) | 1.5 (1.1-1.9) |
| Maryland             | 10.3 | 17.9 (14.8-20.8) | 125.6 (101.6-146.8) | 2.1 (1.7-2.4) | 1.8 (1.4-2.1) |
| Massachusetts        | 7.9  | 13.8 (10.6-16.4) | 137.9 (103.9-167.4) | 2 (1.5-2.4)   | 1.6 (1.2-1.9) |
| Michigan             | 10.7 | 18.2 (15.2-21.1) | 284.4 (234.7-331.7) | 2.9 (2.4-3.3) | 2.2 (1.8-2.6) |
| Minnesota            | 7.9  | 13.8 (10.7-16.4) | 64.6 (49.3-79.3)    | 1.2 (0.9-1.4) | 0.9 (0.7-1.1) |
| Mississippi          | 10.1 | 17.7 (14.6-20.5) | 107.5 (86.3-127.7)  | 3.6 (2.9-4.3) | 3.1 (2.5-3.7) |
| Missouri             | 10.6 | 18.3 (15.2-21.2) | 214.4 (176.7-250.3) | 3.5 (2.9-4.1) | 2.8 (2.3-3.2) |
| Montana              | 7.1  | 11.7 (8.8-14.2)  | 12.4 (8.5-16.2)     | 1.2 (0.8-1.5) | 0.9 (0.6-1.2) |
| Nebraska             | 8.6  | 15.1 (12.1-17.8) | 27.9 (21.4-34.5)    | 1.5 (1.1-1.8) | 1.2 (0.9-1.5) |
| Nevada               | 9.0  | 15.8 (12.8-18.6) | 38.9 (30.2-47.6)    | 1.3 (1-1.6)   | 1.2 (0.9-1.5) |
| New Hampshire        | 7.5  | 13.1 (9.9-15.7)  | 18.1 (13.1-23.1)    | 1.3 (1-1.7)   | 1 (0.7-1.3)   |
| New Jersey           | 9.9  | 17.3 (14.2-20.2) | 223.1 (182.2-261.2) | 2.5 (2-2.9)   | 2 (1.6-2.3)   |
| New Mexico           | 6.7  | 11 (8-13.4)      | 28.9 (20.9-36.6)    | 1.4 (1-1.8)   | 1.1 (0.8-1.4) |

|                                                                                                                                     |      |                  |                     |               |               |
|-------------------------------------------------------------------------------------------------------------------------------------|------|------------------|---------------------|---------------|---------------|
| New York                                                                                                                            | 9.4  | 16.6 (13.5-19.4) | 312.8 (255-365.9)   | 1.6 (1.3-1.8) | 1.2 (1-1.5)   |
| North Carolina                                                                                                                      | 10.3 | 17.8 (14.8-20.8) | 298.9 (246.1-346.8) | 2.9 (2.4-3.4) | 2.5 (2-2.9)   |
| North Dakota                                                                                                                        | 6.0  | 9 (6.2-11.3)     | 9.5 (6.1-12.8)      | 1.3 (0.8-1.7) | 1 (0.6-1.3)   |
| Ohio                                                                                                                                | 12.0 | 19.7 (16.5-22.8) | 372.7 (307.2-430.7) | 3.2 (2.6-3.7) | 2.5 (2.1-2.9) |
| Oklahoma                                                                                                                            | 9.6  | 17 (13.9-19.8)   | 64.7 (51.5-78.5)    | 1.6 (1.3-2)   | 1.4 (1.1-1.7) |
| Oregon                                                                                                                              | 8.6  | 15.3 (12.1-17.9) | 44.2 (34.3-52.9)    | 1.1 (0.8-1.3) | 0.9 (0.7-1)   |
| Pennsylvania                                                                                                                        | 10.9 | 18.5 (15.4-21.5) | 440.3 (361.3-511.8) | 3.4 (2.8-4)   | 2.4 (2-2.8)   |
| Rhode Island                                                                                                                        | 7.1  | 12.1 (9-14.7)    | 18.6 (13.4-23.5)    | 1.8 (1.3-2.2) | 1.2 (0.9-1.5) |
| South Carolina                                                                                                                      | 10.0 | 17.6 (14.5-20.4) | 133.2 (108.6-157.2) | 2.7 (2.2-3.1) | 2.2 (1.8-2.6) |
| South Dakota                                                                                                                        | 6.6  | 10.5 (7.7-12.9)  | 6.9 (4.6-9.3)       | 0.8 (0.5-1.1) | 0.6 (0.4-0.8) |
| Tennessee                                                                                                                           | 10.2 | 17.8 (14.8-20.7) | 162.9 (131.8-193.6) | 2.4 (2-2.9)   | 2.1 (1.7-2.5) |
| Texas                                                                                                                               | 10.3 | 17.8 (14.8-20.7) | 565.3 (460.8-660.1) | 2 (1.6-2.3)   | 2.1 (1.7-2.5) |
| Utah                                                                                                                                | 7.6  | 13.2 (10.1-15.7) | 43.7 (32.9-53.7)    | 1.4 (1.1-1.7) | 1.7 (1.3-2.1) |
| Vermont                                                                                                                             | 6.9  | 11.4 (8.4-13.9)  | 2.7 (1.5-4.1)       | 0.4 (0.2-0.7) | 0.3 (0.2-0.5) |
| Virginia                                                                                                                            | 8.9  | 15.9 (12.8-18.6) | 211.6 (170.6-250.3) | 2.5 (2-3)     | 2.2 (1.8-2.6) |
| Washington                                                                                                                          | 7.9  | 13.7 (10.6-16.4) | 47.8 (35.7-59.4)    | 0.6 (0.5-0.8) | 0.6 (0.4-0.7) |
| West Virginia                                                                                                                       | 9.8  | 17.2 (14.1-20)   | 62.4 (49.6-75)      | 3.4 (2.7-4.1) | 2.4 (1.9-3)   |
| Wisconsin                                                                                                                           | 9.8  | 16.9 (13.8-19.7) | 127.4 (102-150.2)   | 2.2 (1.8-2.6) | 1.7 (1.4-2)   |
| Wyoming                                                                                                                             | 4.7  | 5.6 (3.6-7.4)    | 3 (1.7-4.5)         | 0.5 (0.3-0.8) | 0.5 (0.3-0.7) |
| Abbreviations: PM <sub>2.5</sub> , ambient fine particulate matter; PAF, population attributable fraction; UI, uncertainty interval |      |                  |                     |               |               |

**eTable 5f:** Death due to chronic obstructive pulmonary disease associated with PM<sub>2.5</sub> in the contiguous US and by state

| Location      | PM <sub>2.5</sub><br>(µg/m <sup>3</sup> ) | PAF (%) (95% UI) | Number of deaths (95%<br>UI) | Rate (per 100,000) (95%<br>UI) | Age-standardized<br>rate (per<br>100,000) (95% UI) |
|---------------|-------------------------------------------|------------------|------------------------------|--------------------------------|----------------------------------------------------|
| Contiguous US | 10.1                                      | 0.4 (0.2-1.6)    | 645.7 (300.2-2490.9)         | 0.2 (0.1-0.8)                  | 0.2 (0.1-0.6)                                      |

|                      |      |               |                    |               |               |
|----------------------|------|---------------|--------------------|---------------|---------------|
| Alabama              | 11.6 | 0.6 (0.3-2.2) | 20.6 (8.9-76.1)    | 0.4 (0.2-1.6) | 0.3 (0.1-1.3) |
| Arizona              | 9.5  | 0.2 (0.1-1.3) | 9 (3.7-49.5)       | 0.1 (0.1-0.7) | 0.1 (0-0.6)   |
| Arkansas             | 10.3 | 0.3 (0.1-1.5) | 6.7 (2.7-38)       | 0.2 (0.1-1.3) | 0.2 (0.1-1)   |
| California           | 12.2 | 1.3 (0.7-2.9) | 175.7 (94.5-387.1) | 0.4 (0.2-1)   | 0.4 (0.2-0.9) |
| Colorado             | 7.3  | 0.1 (0-0.6)   | 1.5 (0.6-15.3)     | 0 (0-0.3)     | 0 (0-0.3)     |
| Connecticut          | 8.5  | 0.1 (0-0.9)   | 1.6 (0.6-12.8)     | 0 (0-0.4)     | 0 (0-0.3)     |
| Delaware             | 9.7  | 0.2 (0.1-1.3) | 1 (0.4-6.6)        | 0.1 (0-0.7)   | 0.1 (0-0.5)   |
| District of Columbia | 9.7  | 0.2 (0.1-1.3) | 0.2 (0.1-1.6)      | 0 (0-0.2)     | 0 (0-0.2)     |
| Florida              | 7.6  | 0.1 (0-0.6)   | 8 (3.2-79.9)       | 0 (0-0.4)     | 0 (0-0.2)     |
| Georgia              | 11.0 | 0.4 (0.2-1.9) | 19.5 (8.1-88.6)    | 0.2 (0.1-0.8) | 0.2 (0.1-0.8) |
| Idaho                | 9.2  | 0.2 (0.1-1.2) | 2 (0.8-11)         | 0.1 (0-0.6)   | 0.1 (0-0.6)   |
| Illinois             | 13.3 | 1.6 (0.8-3.5) | 86.5 (42.5-191.5)  | 0.7 (0.3-1.5) | 0.6 (0.3-1.3) |
| Indiana              | 12.2 | 0.8 (0.4-2.6) | 35.9 (15.9-112.1)  | 0.5 (0.2-1.7) | 0.5 (0.2-1.4) |
| Iowa                 | 9.3  | 0.2 (0.1-1.1) | 3 (1.2-21.6)       | 0.1 (0-0.7)   | 0.1 (0-0.5)   |
| Kansas               | 9.4  | 0.2 (0.1-1.2) | 3.1 (1.2-20.9)     | 0.1 (0-0.7)   | 0.1 (0-0.6)   |
| Kentucky             | 11.2 | 0.5 (0.2-2.1) | 18.1 (7.7-70.5)    | 0.4 (0.2-1.6) | 0.3 (0.1-1.3) |
| Louisiana            | 9.2  | 0.2 (0.1-1.1) | 3.7 (1.5-26.7)     | 0.1 (0-0.6)   | 0.1 (0-0.5)   |
| Maine                | 7.5  | 0.1 (0-0.6)   | 0.5 (0.2-5.9)      | 0 (0-0.4)     | 0 (0-0.3)     |
| Maryland             | 10.3 | 0.3 (0.1-1.5) | 5.6 (2.3-30.6)     | 0.1 (0-0.5)   | 0.1 (0-0.4)   |
| Massachusetts        | 7.9  | 0.1 (0-0.7)   | 1.8 (0.7-19)       | 0 (0-0.3)     | 0 (0-0.2)     |
| Michigan             | 10.7 | 0.4 (0.2-1.8) | 21.2 (8.8-98.2)    | 0.2 (0.1-1)   | 0.2 (0.1-0.8) |
| Minnesota            | 7.9  | 0.1 (0-0.7)   | 1.7 (0.7-17)       | 0 (0-0.3)     | 0 (0-0.3)     |
| Mississippi          | 10.1 | 0.2 (0.1-1.4) | 4.8 (1.9-28.9)     | 0.2 (0.1-1)   | 0.1 (0.1-0.8) |
| Missouri             | 10.6 | 0.4 (0.2-1.7) | 14.1 (5.8-66.5)    | 0.2 (0.1-1.1) | 0.2 (0.1-0.9) |
| Montana              | 7.1  | 0.1 (0-0.6)   | 0.4 (0.1-4)        | 0 (0-0.4)     | 0 (0-0.3)     |
| Nebraska             | 8.6  | 0.1 (0-0.9)   | 1.4 (0.6-11.2)     | 0.1 (0-0.6)   | 0.1 (0-0.5)   |
| Nevada               | 9.0  | 0.1 (0.1-1)   | 2.2 (0.9-16.6)     | 0.1 (0-0.6)   | 0.1 (0-0.5)   |
| New Hampshire        | 7.5  | 0.1 (0-0.6)   | 0.4 (0.2-4.5)      | 0 (0-0.3)     | 0 (0-0.3)     |
| New Jersey           | 9.9  | 0.2 (0.1-1.4) | 7.3 (3-42.4)       | 0.1 (0-0.5)   | 0.1 (0-0.4)   |

|                |      |               |                   |               |               |
|----------------|------|---------------|-------------------|---------------|---------------|
| New Mexico     | 6.7  | 0 (0-0.4)     | 0.4 (0.1-4.9)     | 0 (0-0.2)     | 0 (0-0.2)     |
| New York       | 9.4  | 0.2 (0.1-1.2) | 13.1 (5.3-84.2)   | 0.1 (0-0.4)   | 0.1 (0-0.3)   |
| North Carolina | 10.3 | 0.3 (0.1-1.6) | 15.6 (6.4-83.9)   | 0.2 (0.1-0.8) | 0.1 (0.1-0.7) |
| North Dakota   | 6.0  | 0 (0-0.3)     | 0.1 (0-1.1)       | 0 (0-0.1)     | 0 (0-0.1)     |
| Ohio           | 12.0 | 0.7 (0.3-2.4) | 51.3 (22.1-176.6) | 0.4 (0.2-1.5) | 0.3 (0.1-1.2) |
| Oklahoma       | 9.6  | 0.2 (0.1-1.3) | 5.6 (2.3-37.1)    | 0.1 (0.1-0.9) | 0.1 (0-0.8)   |
| Oregon         | 8.6  | 0.1 (0-0.9)   | 2.2 (0.9-18.4)    | 0.1 (0-0.4)   | 0 (0-0.3)     |
| Pennsylvania   | 10.9 | 0.4 (0.2-1.9) | 28.5 (12.2-121.9) | 0.2 (0.1-1)   | 0.2 (0.1-0.7) |
| Rhode Island   | 7.1  | 0 (0-0.5)     | 0.2 (0.1-2.6)     | 0 (0-0.2)     | 0 (0-0.2)     |
| South Carolina | 10.0 | 0.2 (0.1-1.4) | 7 (2.9-40.7)      | 0.1 (0.1-0.8) | 0.1 (0-0.7)   |
| South Dakota   | 6.6  | 0 (0-0.5)     | 0.2 (0.1-2.2)     | 0 (0-0.2)     | 0 (0-0.2)     |
| Tennessee      | 10.2 | 0.3 (0.1-1.5) | 12.3 (5.1-69)     | 0.2 (0.1-1)   | 0.2 (0.1-0.8) |
| Texas          | 10.3 | 0.3 (0.1-1.6) | 33.6 (14-166.9)   | 0.1 (0-0.6)   | 0.1 (0.1-0.6) |
| Utah           | 7.6  | 0.1 (0-0.7)   | 0.5 (0.2-5.3)     | 0 (0-0.2)     | 0 (0-0.2)     |
| Vermont        | 6.9  | 0 (0-0.5)     | 0.1 (0.1-1.7)     | 0 (0-0.3)     | 0 (0-0.2)     |
| Virginia       | 8.9  | 0.1 (0.1-1)   | 4.1 (1.6-33.4)    | 0 (0-0.4)     | 0 (0-0.3)     |
| Washington     | 7.9  | 0.1 (0-0.8)   | 3 (1.2-23.1)      | 0 (0-0.3)     | 0 (0-0.3)     |
| West Virginia  | 9.8  | 0.2 (0.1-1.3) | 3.5 (1.4-21.9)    | 0.2 (0.1-1.2) | 0.1 (0.1-0.8) |
| Wisconsin      | 9.8  | 0.3 (0.1-1.4) | 7.1 (3-37.7)      | 0.1 (0.1-0.7) | 0.1 (0-0.5)   |
| Wyoming        | 4.7  | 0 (0-0.2)     | 0 (0-0.6)         | 0 (0-0.1)     | 0 (0-0.1)     |

**eTable 5g:** Death due to dementia associated with PM<sub>2.5</sub> in the contiguous US and by state

| Location | PM <sub>2.5</sub><br>(µg/m <sup>3</sup> ) | PAF (%) (95% UI) | Number of deaths (95% UI) | Rate (per<br>100,000) (95% UI) | Age-standardized<br>rate (per 100,000)<br>(95% UI) |
|----------|-------------------------------------------|------------------|---------------------------|--------------------------------|----------------------------------------------------|
|----------|-------------------------------------------|------------------|---------------------------|--------------------------------|----------------------------------------------------|

|                      |      |                |                           |                |                |
|----------------------|------|----------------|---------------------------|----------------|----------------|
| Contiguous US        | 10.1 | 8.2 (6-13.1)   | 19851.5 (14420.6-31621.4) | 6.1 (4.5-9.8)  | 5.1 (3.7-8.2)  |
| Alabama              | 11.6 | 9.1 (6.6-14.5) | 402.4 (293.2-640.4)       | 8.3 (6-13.1)   | 7.1 (5.2-11.3) |
| Arizona              | 9.5  | 7.8 (5.7-12.6) | 345.9 (249-555.6)         | 4.9 (3.5-7.9)  | 4 (2.9-6.4)    |
| Arkansas             | 10.3 | 8.5 (6.2-13.5) | 191.7 (136.6-307.1)       | 6.4 (4.5-10.2) | 5.2 (3.7-8.4)  |
| California           | 12.2 | 9.2 (6.7-14.7) | 2078.8 (1512.3-3299.1)    | 5.3 (3.8-8.3)  | 4.7 (3.4-7.5)  |
| Colorado             | 7.3  | 6.4 (4.6-10.3) | 230.3 (166.5-373.7)       | 4.1 (3-6.7)    | 4.3 (3.1-7)    |
| Connecticut          | 8.5  | 7.4 (5.4-11.9) | 242.8 (175.9-389.5)       | 6.8 (4.9-10.9) | 4.5 (3.3-7.3)  |
| Delaware             | 9.7  | 8.2 (5.9-13)   | 65.6 (47.5-104.9)         | 6.8 (4.9-10.9) | 5.3 (3.8-8.5)  |
| District of Columbia | 9.7  | 8.2 (6-13.1)   | 24.1 (17.1-39.6)          | 3.5 (2.5-5.7)  | 3.4 (2.4-5.6)  |
| Florida              | 7.6  | 6.7 (4.9-10.8) | 1084.2 (776.3-1734.2)     | 5.2 (3.7-8.3)  | 3.2 (2.3-5.1)  |
| Georgia              | 11.0 | 8.8 (6.4-14)   | 612.2 (444.8-978.4)       | 5.9 (4.3-9.4)  | 6.6 (4.8-10.5) |
| Idaho                | 9.2  | 7.8 (5.6-12.4) | 100.9 (72-162.5)          | 5.9 (4.2-9.5)  | 5.5 (3.9-8.9)  |
| Illinois             | 13.3 | 9.7 (7.1-15.5) | 944.4 (684.1-1496)        | 7.4 (5.3-11.7) | 6 (4.3-9.5)    |
| Indiana              | 12.2 | 9.3 (6.8-14.9) | 542.6 (394.2-858.1)       | 8.1 (5.9-12.9) | 6.9 (5-10.9)   |
| Iowa                 | 9.3  | 7.9 (5.8-12.7) | 253.6 (185.1-404.1)       | 8.1 (5.9-12.8) | 5.6 (4.1-8.9)  |
| Kansas               | 9.4  | 8 (5.8-12.7)   | 192.2 (138-307.2)         | 6.6 (4.7-10.5) | 5.1 (3.7-8.2)  |
| Kentucky             | 11.2 | 8.9 (6.5-14.2) | 364.2 (264.9-582.2)       | 8.2 (5.9-13.1) | 7.2 (5.2-11.5) |
| Louisiana            | 9.2  | 7.9 (5.8-12.6) | 264.4 (191.1-422.6)       | 5.6 (4.1-9)    | 5.3 (3.8-8.4)  |
| Maine                | 7.5  | 6.7 (4.9-10.9) | 111.6 (79.4-178.6)        | 8.4 (5.9-13.4) | 5.6 (4-9)      |
| Maryland             | 10.3 | 8.5 (6.2-13.5) | 346.9 (251.4-551.8)       | 5.7 (4.2-9.1)  | 4.9 (3.6-7.8)  |
| Massachusetts        | 7.9  | 7 (5.1-11.2)   | 517.2 (371-827.7)         | 7.5 (5.4-12.1) | 5.5 (4-8.8)    |
| Michigan             | 10.7 | 8.6 (6.3-13.7) | 688.6 (503.6-1099.3)      | 6.9 (5.1-11)   | 5.3 (3.9-8.5)  |
| Minnesota            | 7.9  | 7 (5.1-11.2)   | 379.6 (273.3-612.1)       | 6.8 (4.9-11)   | 5.3 (3.8-8.6)  |
| Mississippi          | 10.1 | 8.4 (6.1-13.4) | 193.4 (140.3-307.5)       | 6.5 (4.7-10.3) | 5.9 (4.3-9.4)  |
| Missouri             | 10.6 | 8.6 (6.3-13.8) | 428.8 (312.1-683.3)       | 7 (5.1-11.2)   | 5.4 (4-8.7)    |
| Montana              | 7.1  | 6.2 (4.5-10.1) | 57.7 (41.5-93.9)          | 5.5 (3.9-8.9)  | 4.2 (3-6.8)    |
| Nebraska             | 8.6  | 7.4 (5.4-11.9) | 122.5 (88.1-197.1)        | 6.4 (4.6-10.3) | 4.9 (3.6-8)    |
| Nevada               | 9.0  | 7.7 (5.6-12.3) | 108.5 (77.7-175)          | 3.6 (2.6-5.8)  | 3.8 (2.7-6.1)  |
| New Hampshire        | 7.5  | 6.7 (4.9-10.9) | 91.9 (65.6-146.9)         | 6.8 (4.9-10.9) | 5.1 (3.6-8.2)  |

|                                                                                                                                     |      |                |                       |                |                |
|-------------------------------------------------------------------------------------------------------------------------------------|------|----------------|-----------------------|----------------|----------------|
| New Jersey                                                                                                                          | 9.9  | 8.3 (6-13.2)   | 517.5 (373.5-822.3)   | 5.7 (4.1-9.1)  | 4.3 (3.1-6.8)  |
| New Mexico                                                                                                                          | 6.7  | 6 (4.3-9.7)    | 76.4 (54.7-123.6)     | 3.7 (2.6-5.9)  | 3 (2.2-4.9)    |
| New York                                                                                                                            | 9.4  | 8 (5.8-12.8)   | 872 (634.6-1378.7)    | 4.4 (3.2-6.9)  | 3.2 (2.4-5.1)  |
| North Carolina                                                                                                                      | 10.3 | 8.5 (6.2-13.5) | 762.1 (551.3-1214.6)  | 7.4 (5.4-11.8) | 6.6 (4.8-10.5) |
| North Dakota                                                                                                                        | 6.0  | 5.3 (3.7-8.6)  | 33 (23-54.5)          | 4.4 (3-7.2)    | 3.1 (2.2-5.2)  |
| Ohio                                                                                                                                | 12.0 | 9.2 (6.7-14.7) | 1030.2 (749.2-1641.3) | 8.8 (6.4-14.1) | 6.7 (4.9-10.7) |
| Oklahoma                                                                                                                            | 9.6  | 8.1 (5.9-13)   | 247 (178.3-392.8)     | 6.3 (4.5-10)   | 5.5 (4-8.8)    |
| Oregon                                                                                                                              | 8.6  | 7.5 (5.5-12)   | 301 (219.9-484)       | 7.3 (5.3-11.7) | 5.8 (4.3-9.4)  |
| Pennsylvania                                                                                                                        | 10.9 | 8.7 (6.4-13.9) | 1048.9 (769.5-1663.1) | 8.2 (6-13)     | 5.3 (3.9-8.5)  |
| Rhode Island                                                                                                                        | 7.1  | 6.4 (4.6-10.3) | 78 (55.9-125.5)       | 7.4 (5.3-11.8) | 4.9 (3.5-7.8)  |
| South Carolina                                                                                                                      | 10.0 | 8.3 (6.1-13.3) | 379.2 (274.7-607.8)   | 7.5 (5.5-12.1) | 6.7 (4.8-10.7) |
| South Dakota                                                                                                                        | 6.6  | 5.8 (4.1-9.4)  | 36.9 (26.3-60.2)      | 4.2 (3-6.9)    | 3.1 (2.2-5)    |
| Tennessee                                                                                                                           | 10.2 | 8.4 (6.2-13.5) | 537.8 (388.4-851.1)   | 8 (5.8-12.7)   | 7.1 (5.1-11.2) |
| Texas                                                                                                                               | 10.3 | 8.5 (6.2-13.5) | 1310.5 (959.6-2087.8) | 4.6 (3.4-7.4)  | 5.3 (3.9-8.4)  |
| Utah                                                                                                                                | 7.6  | 6.7 (4.9-10.9) | 120.2 (85.7-192.6)    | 3.9 (2.8-6.2)  | 5.1 (3.6-8.2)  |
| Vermont                                                                                                                             | 6.9  | 6.2 (4.4-10)   | 40 (28.4-63.9)        | 6.4 (4.6-10.2) | 4.6 (3.3-7.4)  |
| Virginia                                                                                                                            | 8.9  | 7.7 (5.6-12.4) | 496.7 (361.9-789.7)   | 5.9 (4.3-9.3)  | 5.4 (3.9-8.5)  |
| Washington                                                                                                                          | 7.9  | 7 (5.1-11.2)   | 385 (277-618.6)       | 5.2 (3.7-8.4)  | 4.8 (3.4-7.7)  |
| West Virginia                                                                                                                       | 9.8  | 8.2 (6-13.1)   | 140.9 (101.4-225.3)   | 7.8 (5.6-12.4) | 5.6 (4-8.9)    |
| Wisconsin                                                                                                                           | 9.8  | 8.1 (5.9-13)   | 438.3 (318.7-689.9)   | 7.6 (5.5-11.9) | 5.7 (4.1-9)    |
| Wyoming                                                                                                                             | 4.7  | 3.8 (2.6-6.3)  | 13 (8.8-22)           | 2.3 (1.5-3.8)  | 2 (1.4-3.4)    |
| Abbreviations: PM <sub>2.5</sub> , ambient fine particulate matter; PAF, population attributable fraction; UI, uncertainty interval |      |                |                       |                |                |

**eTable 5h:** Death due to type 2 diabetes associated with PM<sub>2.5</sub> in the contiguous US and by state



| Location                | PM <sub>2.5</sub><br>(µg/m <sup>3</sup> ) | PAF (%) (95% UI) | Number of deaths (95% UI) | Rate (per<br>100,000) (95% UI) | Age-standardized<br>rate (per 100,000)<br>(95% UI) |
|-------------------------|-------------------------------------------|------------------|---------------------------|--------------------------------|----------------------------------------------------|
| Contiguous US           | 10.1                                      | 1.4 (1.2-1.5)    | 501.3 (447.5-561.1)       | 0.2 (0.1-0.2)                  | 0.1 (0.1-0.2)                                      |
| Alabama                 | 11.6                                      | 1.6 (1.4-1.8)    | 5.2 (4.4-6.1)             | 0.1 (0.1-0.1)                  | 0.1 (0.1-0.1)                                      |
| Arizona                 | 9.5                                       | 0.6 (0.5-0.7)    | 4.8 (4.2-5.6)             | 0.1 (0.1-0.1)                  | 0.1 (0-0.1)                                        |
| Arkansas                | 10.3                                      | 0.7 (0.6-0.8)    | 1.7 (1.5-2.1)             | 0.1 (0-0.1)                    | 0 (0-0.1)                                          |
| California              | 12.2                                      | 4.8 (4.3-5.4)    | 299.9 (269-333.1)         | 0.8 (0.7-0.8)                  | 0.7 (0.6-0.8)                                      |
| Colorado                | 7.3                                       | 0.1 (0.1-0.2)    | 0.6 (0.5-0.7)             | 0 (0-0)                        | 0 (0-0)                                            |
| Connecticut             | 8.5                                       | 0.3 (0.2-0.3)    | 0.4 (0.3-0.5)             | 0 (0-0)                        | 0 (0-0)                                            |
| Delaware                | 9.7                                       | 0.5 (0.4-0.5)    | 0.4 (0.3-0.5)             | 0 (0-0.1)                      | 0 (0-0)                                            |
| District of<br>Columbia | 9.7                                       | 0.5 (0.4-0.5)    | 0.1 (0.1-0.2)             | 0 (0-0)                        | 0 (0-0)                                            |
| Florida                 | 7.6                                       | 0.2 (0.1-0.2)    | 3.2 (2.8-3.6)             | 0 (0-0)                        | 0 (0-0)                                            |
| Georgia                 | 11.0                                      | 1.1 (0.9-1.2)    | 5.3 (4.5-6.1)             | 0.1 (0-0.1)                    | 0 (0-0.1)                                          |
| Idaho                   | 9.2                                       | 0.6 (0.5-0.6)    | 0.9 (0.7-1.1)             | 0.1 (0-0.1)                    | 0 (0-0.1)                                          |
| Illinois                | 13.3                                      | 5 (4.4-5.5)      | 40.6 (35.7-45.9)          | 0.3 (0.3-0.4)                  | 0.3 (0.2-0.3)                                      |
| Indiana                 | 12.2                                      | 2.3 (2.1-2.6)    | 18 (15.7-20.8)            | 0.3 (0.2-0.3)                  | 0.2 (0.2-0.3)                                      |
| Iowa                    | 9.3                                       | 0.4 (0.4-0.4)    | 1 (0.9-1.2)               | 0 (0-0)                        | 0 (0-0)                                            |
| Kansas                  | 9.4                                       | 0.4 (0.4-0.5)    | 1.3 (1.1-1.5)             | 0 (0-0.1)                      | 0 (0-0)                                            |
| Kentucky                | 11.2                                      | 1.4 (1.2-1.6)    | 6.7 (5.7-7.7)             | 0.1 (0.1-0.2)                  | 0.1 (0.1-0.1)                                      |
| Louisiana               | 9.2                                       | 0.4 (0.3-0.4)    | 0.8 (0.6-0.9)             | 0 (0-0)                        | 0 (0-0)                                            |
| Maine                   | 7.5                                       | 0.1 (0.1-0.1)    | 0.2 (0.1-0.2)             | 0 (0-0)                        | 0 (0-0)                                            |
| Maryland                | 10.3                                      | 0.7 (0.6-0.8)    | 2.8 (2.4-3.2)             | 0 (0-0.1)                      | 0 (0-0)                                            |
| Massachusetts           | 7.9                                       | 0.2 (0.1-0.2)    | 0.5 (0.4-0.6)             | 0 (0-0)                        | 0 (0-0)                                            |
| Michigan                | 10.7                                      | 1 (0.9-1.1)      | 9.1 (7.9-10.4)            | 0.1 (0.1-0.1)                  | 0.1 (0.1-0.1)                                      |
| Minnesota               | 7.9                                       | 0.2 (0.2-0.2)    | 1 (0.9-1.2)               | 0 (0-0)                        | 0 (0-0)                                            |
| Mississippi             | 10.1                                      | 0.6 (0.5-0.7)    | 0.9 (0.7-1.1)             | 0 (0-0)                        | 0 (0-0)                                            |
| Missouri                | 10.6                                      | 0.9 (0.8-1.1)    | 4.1 (3.5-4.7)             | 0.1 (0.1-0.1)                  | 0.1 (0-0.1)                                        |
| Montana                 | 7.1                                       | 0.1 (0.1-0.1)    | 0.1 (0.1-0.2)             | 0 (0-0)                        | 0 (0-0)                                            |

|                |      |               |                  |               |               |
|----------------|------|---------------|------------------|---------------|---------------|
| Nebraska       | 8.6  | 0.3 (0.3-0.3) | 0.5 (0.4-0.6)    | 0 (0-0)       | 0 (0-0)       |
| Nevada         | 9.0  | 0.3 (0.3-0.4) | 0.5 (0.4-0.6)    | 0 (0-0)       | 0 (0-0)       |
| New Hampshire  | 7.5  | 0.1 (0.1-0.1) | 0.1 (0.1-0.2)    | 0 (0-0)       | 0 (0-0)       |
| New Jersey     | 9.9  | 0.6 (0.5-0.7) | 2 (1.7-2.4)      | 0 (0-0)       | 0 (0-0)       |
| New Mexico     | 6.7  | 0.1 (0.1-0.1) | 0.2 (0.2-0.2)    | 0 (0-0)       | 0 (0-0)       |
| New York       | 9.4  | 0.5 (0.4-0.5) | 3.8 (3.3-4.3)    | 0 (0-0)       | 0 (0-0)       |
| North Carolina | 10.3 | 0.7 (0.6-0.8) | 7.1 (6.2-8.1)    | 0.1 (0.1-0.1) | 0.1 (0.1-0.1) |
| North Dakota   | 6.0  | 0 (0-0.1)     | 0 (0-0)          | 0 (0-0)       | 0 (0-0)       |
| Ohio           | 12.0 | 1.9 (1.7-2.2) | 27.2 (23.9-30.7) | 0.2 (0.2-0.3) | 0.2 (0.2-0.2) |
| Oklahoma       | 9.6  | 0.5 (0.4-0.5) | 2.1 (1.8-2.4)    | 0.1 (0-0.1)   | 0 (0-0.1)     |
| Oregon         | 8.6  | 0.3 (0.2-0.3) | 1.4 (1.2-1.7)    | 0 (0-0)       | 0 (0-0)       |
| Pennsylvania   | 10.9 | 1.2 (1-1.3)   | 13.9 (12.2-15.8) | 0.1 (0.1-0.1) | 0.1 (0.1-0.1) |
| Rhode Island   | 7.1  | 0.1 (0.1-0.1) | 0.1 (0-0.1)      | 0 (0-0)       | 0 (0-0)       |
| South Carolina | 10.0 | 0.6 (0.5-0.7) | 2.2 (1.9-2.5)    | 0 (0-0.1)     | 0 (0-0)       |
| South Dakota   | 6.6  | 0.1 (0.1-0.1) | 0.1 (0.1-0.1)    | 0 (0-0)       | 0 (0-0)       |
| Tennessee      | 10.2 | 0.7 (0.6-0.8) | 4.6 (4-5.3)      | 0.1 (0.1-0.1) | 0.1 (0-0.1)   |
| Texas          | 10.3 | 0.8 (0.7-0.9) | 15.9 (13.9-18.1) | 0.1 (0-0.1)   | 0.1 (0.1-0.1) |
| Utah           | 7.6  | 0.2 (0.1-0.2) | 0.3 (0.3-0.4)    | 0 (0-0)       | 0 (0-0)       |
| Vermont        | 6.9  | 0.1 (0.1-0.1) | 0.1 (0-0.1)      | 0 (0-0)       | 0 (0-0)       |
| Virginia       | 8.9  | 0.3 (0.3-0.3) | 1.9 (1.6-2.2)    | 0 (0-0)       | 0 (0-0)       |
| Washington     | 7.9  | 0.2 (0.2-0.3) | 1.8 (1.5-2)      | 0 (0-0)       | 0 (0-0)       |
| West Virginia  | 9.8  | 0.5 (0.5-0.6) | 1.8 (1.5-2.1)    | 0.1 (0.1-0.1) | 0.1 (0.1-0.1) |
| Wisconsin      | 9.8  | 0.7 (0.6-0.7) | 4.2 (3.7-4.8)    | 0.1 (0.1-0.1) | 0.1 (0-0.1)   |
| Wyoming        | 4.7  | 0 (0-0)       | 0 (0-0)          | 0 (0-0)       | 0 (0-0)       |

Abbreviations: PM<sub>2.5</sub>, ambient fine particulate matter; PAF, population attributable fraction; UI, uncertainty interval

**eTable 5i:** Death due to hypertension associated with PM<sub>2.5</sub> in the contiguous US and by state

| Location                | PM <sub>2.5</sub><br>(µg/m <sup>3</sup> ) | PAF (%) (95% UI) | Number of deaths (95% UI) | Rate (per<br>100,000) (95% UI) | Age-standardized<br>rate (per 100,000)<br>(95% UI) |
|-------------------------|-------------------------------------------|------------------|---------------------------|--------------------------------|----------------------------------------------------|
| Contiguous US           | 10.1                                      | 34.1 (30.6-37.6) | 30696.9 (27518.1-33881.9) | 9.5 (8.5-10.5)                 | 8 (7.2-8.8)                                        |
| Alabama                 | 11.6                                      | 37 (33.3-40.8)   | 507.3 (448.7-563.9)       | 10.4 (9.2-11.6)                | 8.7 (7.8-9.7)                                      |
| Arizona                 | 9.5                                       | 32.8 (29.3-36.2) | 753.7 (668.2-838.5)       | 10.7 (9.5-12)                  | 8.7 (7.7-9.7)                                      |
| Arkansas                | 10.3                                      | 35 (31.4-38.6)   | 449 (391.5-503.1)         | 14.9 (13-16.7)                 | 12.4 (10.8-13.9)                                   |
| California              | 12.2                                      | 37.4 (33.6-41.2) | 4346.9 (3882.7-4790.4)    | 11 (9.8-12.1)                  | 9.9 (8.8-10.9)                                     |
| Colorado                | 7.3                                       | 27.6 (24.6-30.6) | 278.4 (242.4-314.8)       | 5 (4.3-5.6)                    | 4.7 (4.1-5.4)                                      |
| Connecticut             | 8.5                                       | 31.3 (28-34.7)   | 223.5 (194.7-255.3)       | 6.2 (5.4-7.1)                  | 4.4 (3.9-5.1)                                      |
| Delaware                | 9.7                                       | 33.9 (30.4-37.5) | 71.8 (58.7-84.1)          | 7.5 (6.1-8.7)                  | 5.9 (4.8-6.9)                                      |
| District of<br>Columbia | 9.7                                       | 34 (30.4-37.5)   | 118.6 (100.2-137.7)       | 17.1 (14.4-19.8)               | 17.5 (14.8-20.3)                                   |
| Florida                 | 7.6                                       | 28.8 (25.7-32)   | 1862.5 (1649.6-2071.2)    | 8.9 (7.9-9.9)                  | 6 (5.3-6.7)                                        |
| Georgia                 | 11.0                                      | 36.1 (32.4-39.8) | 1224.4 (1094.4-1356.3)    | 11.7 (10.5-13)                 | 11.5 (10.2-12.7)                                   |
| Idaho                   | 9.2                                       | 32.5 (29.1-35.9) | 97 (81.5-112.4)           | 5.7 (4.7-6.5)                  | 5.2 (4.3-6)                                        |
| Illinois                | 13.3                                      | 39.2 (35.3-43.1) | 1326.4 (1178.9-1462.3)    | 10.4 (9.2-11.4)                | 8.5 (7.6-9.4)                                      |
| Indiana                 | 12.2                                      | 38 (34.1-41.8)   | 653 (579.4-726.8)         | 9.8 (8.7-10.9)                 | 8.3 (7.4-9.3)                                      |
| Iowa                    | 9.3                                       | 33.1 (29.7-36.6) | 310.4 (270.8-347.1)       | 9.9 (8.6-11)                   | 7.1 (6.2-7.9)                                      |
| Kansas                  | 9.4                                       | 33.2 (29.7-36.7) | 214.8 (187.1-244.3)       | 7.4 (6.4-8.4)                  | 5.8 (5-6.6)                                        |
| Kentucky                | 11.2                                      | 36.5 (32.8-40.2) | 456.6 (400.2-511.6)       | 10.3 (9-11.5)                  | 8.6 (7.6-9.7)                                      |
| Louisiana               | 9.2                                       | 33 (29.6-36.5)   | 498.3 (439.2-559.5)       | 10.6 (9.4-11.9)                | 9.5 (8.3-10.7)                                     |
| Maine                   | 7.5                                       | 28.9 (25.8-32.1) | 75.4 (63.3-87.9)          | 5.6 (4.7-6.6)                  | 3.9 (3.2-4.6)                                      |
| Maryland                | 10.3                                      | 35 (31.4-38.6)   | 690.1 (616.4-765.5)       | 11.4 (10.2-12.6)               | 9.6 (8.6-10.7)                                     |
| Massachusetts           | 7.9                                       | 29.8 (26.6-33)   | 371.7 (324.5-416.4)       | 5.4 (4.7-6.1)                  | 4.1 (3.6-4.6)                                      |
| Michigan                | 10.7                                      | 35.4 (31.8-39.1) | 1105.2 (981.2-1217.3)     | 11.1 (9.8-12.2)                | 8.6 (7.7-9.5)                                      |
| Minnesota               | 7.9                                       | 29.8 (26.6-33)   | 315.6 (276-356.3)         | 5.7 (4.9-6.4)                  | 4.4 (3.8-5)                                        |
| Mississippi             | 10.1                                      | 34.7 (31.1-38.3) | 571 (506.8-633.7)         | 19.1 (17-21.2)                 | 16.6 (14.7-18.4)                                   |
| Missouri                | 10.6                                      | 35.5 (31.9-39.2) | 584.2 (517.8-651.5)       | 9.6 (8.5-10.7)                 | 7.6 (6.7-8.4)                                      |

|                                                                                                                                     |      |                  |                        |                  |                  |
|-------------------------------------------------------------------------------------------------------------------------------------|------|------------------|------------------------|------------------|------------------|
| Montana                                                                                                                             | 7.1  | 27.1 (24.1-30.1) | 59.7 (49.2-70.3)       | 5.7 (4.7-6.7)    | 4.3 (3.5-5)      |
| Nebraska                                                                                                                            | 8.6  | 31.4 (28.1-34.7) | 149.4 (127.4-170.9)    | 7.8 (6.6-8.9)    | 6.1 (5.1-6.9)    |
| Nevada                                                                                                                              | 9.0  | 32.3 (28.9-35.7) | 348.6 (307.1-390.3)    | 11.6 (10.2-13)   | 10.9 (9.6-12.2)  |
| New Hampshire                                                                                                                       | 7.5  | 28.9 (25.8-32.1) | 77.7 (65.1-91.2)       | 5.8 (4.8-6.8)    | 4.2 (3.5-5)      |
| New Jersey                                                                                                                          | 9.9  | 34.2 (30.7-37.8) | 613.7 (541.4-686.4)    | 6.8 (6-7.6)      | 5.3 (4.7-6)      |
| New Mexico                                                                                                                          | 6.7  | 26.2 (23.4-29.2) | 107.9 (91.5-124.7)     | 5.2 (4.4-6)      | 4.2 (3.6-4.9)    |
| New York                                                                                                                            | 9.4  | 33.3 (29.8-36.8) | 2267.9 (2019.8-2514.1) | 11.4 (10.2-12.7) | 8.9 (7.9-9.8)    |
| North Carolina                                                                                                                      | 10.3 | 34.9 (31.3-38.6) | 789.8 (698.4-881.7)    | 7.7 (6.8-8.6)    | 6.6 (5.8-7.4)    |
| North Dakota                                                                                                                        | 6.0  | 23.5 (20.9-26.2) | 38.7 (31.2-46.5)       | 5.1 (4.1-6.2)    | 4 (3.2-4.9)      |
| Ohio                                                                                                                                | 12.0 | 37.6 (33.8-41.4) | 1289.6 (1150.8-1433)   | 11.1 (9.9-12.3)  | 8.6 (7.7-9.6)    |
| Oklahoma                                                                                                                            | 9.6  | 33.8 (30.3-37.3) | 1067.4 (952-1186.9)    | 27.2 (24.2-30.2) | 23.5 (20.9-26.2) |
| Oregon                                                                                                                              | 8.6  | 31.6 (28.3-35)   | 290.6 (254-325.1)      | 7 (6.1-7.8)      | 5.6 (4.8-6.2)    |
| Pennsylvania                                                                                                                        | 10.9 | 35.8 (32.2-39.5) | 1009.9 (896.5-1118.3)  | 7.9 (7-8.7)      | 5.6 (5-6.2)      |
| Rhode Island                                                                                                                        | 7.1  | 27.7 (24.7-30.8) | 79.8 (67-93)           | 7.5 (6.3-8.8)    | 5.4 (4.5-6.3)    |
| South Carolina                                                                                                                      | 10.0 | 34.5 (31-38.1)   | 444.2 (392.5-497.9)    | 8.8 (7.8-9.9)    | 7.4 (6.6-8.3)    |
| South Dakota                                                                                                                        | 6.6  | 25.4 (22.6-28.3) | 71.1 (59.6-82.9)       | 8.2 (6.9-9.5)    | 6.1 (5.2-7.2)    |
| Tennessee                                                                                                                           | 10.2 | 34.9 (31.3-38.5) | 778.3 (687.3-861.7)    | 11.6 (10.2-12.8) | 10 (8.8-11.1)    |
| Texas                                                                                                                               | 10.3 | 35 (31.4-38.6)   | 2236.2 (2006-2479.1)   | 7.9 (7.1-8.8)    | 8.3 (7.4-9.2)    |
| Utah                                                                                                                                | 7.6  | 28.9 (25.8-32)   | 105.7 (89.5-122)       | 3.4 (2.9-3.9)    | 4.2 (3.6-4.9)    |
| Vermont                                                                                                                             | 6.9  | 26.8 (23.8-29.7) | 60.4 (49-71.9)         | 9.7 (7.9-11.5)   | 7 (5.6-8.3)      |
| Virginia                                                                                                                            | 8.9  | 32.4 (29-35.9)   | 502.4 (442.3-564.2)    | 5.9 (5.2-6.7)    | 5.3 (4.6-5.9)    |
| Washington                                                                                                                          | 7.9  | 29.7 (26.6-33)   | 544.1 (478.1-611)      | 7.3 (6.5-8.2)    | 6.6 (5.8-7.4)    |
| West Virginia                                                                                                                       | 9.8  | 34 (30.5-37.6)   | 188.5 (162.9-214.3)    | 10.4 (9-11.8)    | 7.9 (6.8-8.9)    |
| Wisconsin                                                                                                                           | 9.8  | 33.8 (30.3-37.3) | 452.1 (397.8-506.4)    | 7.8 (6.9-8.7)    | 6 (5.3-6.7)      |
| Wyoming                                                                                                                             | 4.7  | 17.5 (15.5-19.6) | 17.4 (13.3-21.5)       | 3 (2.3-3.7)      | 2.5 (1.9-3.1)    |
| Abbreviations: PM <sub>2.5</sub> , ambient fine particulate matter; PAF, population attributable fraction; UI, uncertainty interval |      |                  |                        |                  |                  |

**eTable 5j:** Death due to lung cancer associated with PM<sub>2.5</sub> in the contiguous US and by state

| Location                | PM <sub>2.5</sub><br>(µg/m <sup>3</sup> ) | PAF (%) (95% UI) | Number of deaths (95% UI) | Rate (per<br>100,000) (95% UI) | Age-standardized<br>rate (per 100,000)<br>(95% UI) |
|-------------------------|-------------------------------------------|------------------|---------------------------|--------------------------------|----------------------------------------------------|
| Contiguous US           | 10.1                                      | 12.1 (10.4-14.1) | 17545.3 (15055.3-20464.5) | 5.4 (4.7-6.3)                  | 4.4 (3.8-5.1)                                      |
| Alabama                 | 11.6                                      | 13.3 (11.4-15.5) | 392.2 (334.1-457.2)       | 8 (6.9-9.4)                    | 6.2 (5.3-7.2)                                      |
| Arizona                 | 9.5                                       | 11.5 (9.9-13.5)  | 319.9 (271.6-374.5)       | 4.6 (3.9-5.3)                  | 3.5 (3-4.1)                                        |
| Arkansas                | 10.3                                      | 12.4 (10.7-14.5) | 243.8 (208-287.9)         | 8.1 (6.9-9.6)                  | 6.3 (5.4-7.5)                                      |
| California              | 12.2                                      | 13.5 (11.6-15.7) | 1554.9 (1327.7-1807.1)    | 3.9 (3.4-4.6)                  | 3.6 (3.1-4.2)                                      |
| Colorado                | 7.3                                       | 9.4 (8.1-11.1)   | 141.4 (120.2-166.5)       | 2.5 (2.1-3)                    | 2.3 (2-2.8)                                        |
| Connecticut             | 8.5                                       | 10.9 (9.4-12.8)  | 164.5 (139.3-194.4)       | 4.6 (3.9-5.4)                  | 3.4 (2.9-4.1)                                      |
| Delaware                | 9.7                                       | 12 (10.3-14)     | 66 (55.6-78.6)            | 6.9 (5.8-8.2)                  | 5 (4.2-5.9)                                        |
| District of<br>Columbia | 9.7                                       | 12 (10.3-14)     | 24.4 (19.6-30.1)          | 3.5 (2.8-4.3)                  | 3.7 (3-4.6)                                        |
| Florida                 | 7.6                                       | 9.9 (8.5-11.6)   | 1131.9 (963.5-1325.3)     | 5.4 (4.6-6.3)                  | 3.6 (3-4.2)                                        |
| Georgia                 | 11.0                                      | 12.9 (11.1-15.1) | 568.4 (484.9-667.4)       | 5.4 (4.6-6.4)                  | 5 (4.3-5.9)                                        |
| Idaho                   | 9.2                                       | 11.4 (9.8-13.3)  | 69.4 (58-82.8)            | 4 (3.4-4.8)                    | 3.4 (2.9-4.1)                                      |
| Illinois                | 13.3                                      | 14.2 (12.2-16.6) | 855.1 (731.6-994.1)       | 6.7 (5.7-7.8)                  | 5.6 (4.8-6.5)                                      |
| Indiana                 | 12.2                                      | 13.7 (11.8-16)   | 519.4 (443.7-604.8)       | 7.8 (6.7-9.1)                  | 6.5 (5.5-7.5)                                      |
| Iowa                    | 9.3                                       | 11.7 (10-13.6)   | 188.9 (159.5-221.5)       | 6 (5.1-7)                      | 4.6 (3.9-5.4)                                      |
| Kansas                  | 9.4                                       | 11.7 (10-13.7)   | 162.7 (138.1-193)         | 5.6 (4.7-6.6)                  | 4.6 (3.9-5.5)                                      |
| Kentucky                | 11.2                                      | 13.1 (11.2-15.2) | 412.1 (348.6-480.1)       | 9.3 (7.8-10.8)                 | 7.4 (6.3-8.6)                                      |
| Louisiana               | 9.2                                       | 11.6 (10-13.6)   | 297.4 (252.3-348)         | 6.3 (5.4-7.4)                  | 5.4 (4.6-6.3)                                      |
| Maine                   | 7.5                                       | 10 (8.5-11.6)    | 91.5 (77.2-109)           | 6.9 (5.8-8.2)                  | 4.5 (3.8-5.3)                                      |
| Maryland                | 10.3                                      | 12.4 (10.7-14.5) | 320.6 (273.6-374.8)       | 5.3 (4.5-6.2)                  | 4.5 (3.8-5.2)                                      |
| Massachusetts           | 7.9                                       | 10.3 (8.8-12)    | 316.4 (270-372.5)         | 4.6 (3.9-5.4)                  | 3.6 (3.1-4.3)                                      |
| Michigan                | 10.7                                      | 12.6 (10.8-14.7) | 696.1 (596.7-812.8)       | 7 (6-8.2)                      | 5.4 (4.6-6.3)                                      |
| Minnesota               | 7.9                                       | 10.3 (8.8-12.1)  | 238.5 (202.8-277.2)       | 4.3 (3.6-5)                    | 3.5 (3-4.1)                                        |
| Mississippi             | 10.1                                      | 12.3 (10.6-14.4) | 222.1 (189-263.7)         | 7.4 (6.3-8.8)                  | 6.1 (5.2-7.2)                                      |
| Missouri                | 10.6                                      | 12.7 (10.9-14.8) | 467.6 (398.1-549.5)       | 7.6 (6.5-9)                    | 5.9 (5-6.9)                                        |

|                                                                                                                                     |      |                  |                      |                |               |
|-------------------------------------------------------------------------------------------------------------------------------------|------|------------------|----------------------|----------------|---------------|
| Montana                                                                                                                             | 7.1  | 9.2 (7.9-10.8)   | 43 (35.6-51.9)       | 4.1 (3.4-4.9)  | 3 (2.5-3.6)   |
| Nebraska                                                                                                                            | 8.6  | 11 (9.4-12.8)    | 89.7 (75.4-104.8)    | 4.7 (3.9-5.5)  | 3.9 (3.3-4.6) |
| Nevada                                                                                                                              | 9.0  | 11.3 (9.7-13.2)  | 148.8 (126.8-175.9)  | 5 (4.2-5.9)    | 4.3 (3.7-5.1) |
| New Hampshire                                                                                                                       | 7.5  | 10 (8.5-11.6)    | 69.8 (58.9-82.7)     | 5.2 (4.4-6.2)  | 3.8 (3.2-4.6) |
| New Jersey                                                                                                                          | 9.9  | 12.1 (10.4-14.2) | 432.7 (366.9-505.5)  | 4.8 (4.1-5.6)  | 3.8 (3.2-4.5) |
| New Mexico                                                                                                                          | 6.7  | 8.9 (7.6-10.4)   | 60.3 (50.3-71.5)     | 2.9 (2.4-3.4)  | 2.3 (1.9-2.7) |
| New York                                                                                                                            | 9.4  | 11.7 (10.1-13.7) | 918.7 (785.4-1075.7) | 4.6 (4-5.4)    | 3.7 (3.1-4.3) |
| North Carolina                                                                                                                      | 10.3 | 12.4 (10.7-14.5) | 657.3 (556.1-766)    | 6.4 (5.4-7.5)  | 5.2 (4.4-6.1) |
| North Dakota                                                                                                                        | 6.0  | 7.8 (6.7-9.2)    | 24.2 (20.1-29.2)     | 3.2 (2.7-3.9)  | 2.7 (2.3-3.3) |
| Ohio                                                                                                                                | 12.0 | 13.5 (11.6-15.8) | 922.3 (790.5-1078.7) | 7.9 (6.8-9.3)  | 6.1 (5.2-7.1) |
| Oklahoma                                                                                                                            | 9.6  | 11.9 (10.2-13.9) | 264.1 (225-308.7)    | 6.7 (5.7-7.9)  | 5.6 (4.8-6.5) |
| Oregon                                                                                                                              | 8.6  | 11 (9.5-12.9)    | 205.8 (174.7-242.4)  | 5 (4.2-5.9)    | 3.9 (3.3-4.5) |
| Pennsylvania                                                                                                                        | 10.9 | 12.8 (11-14.9)   | 885.3 (757.5-1029.7) | 6.9 (5.9-8)    | 5 (4.2-5.8)   |
| Rhode Island                                                                                                                        | 7.1  | 9.5 (8.1-11.1)   | 52.6 (44.1-62.8)     | 5 (4.2-5.9)    | 3.7 (3.1-4.4) |
| South Carolina                                                                                                                      | 10.0 | 12.3 (10.5-14.3) | 331.2 (283-390.6)    | 6.6 (5.6-7.8)  | 5 (4.3-6)     |
| South Dakota                                                                                                                        | 6.6  | 8.6 (7.3-10)     | 36.2 (29.8-43.2)     | 4.2 (3.4-5)    | 3.3 (2.7-3.9) |
| Tennessee                                                                                                                           | 10.2 | 12.4 (10.6-14.5) | 496.6 (423.5-579)    | 7.4 (6.3-8.6)  | 5.9 (5-6.9)   |
| Texas                                                                                                                               | 10.3 | 12.4 (10.7-14.5) | 1133 (965.9-1321.8)  | 4 (3.4-4.7)    | 4.1 (3.5-4.7) |
| Utah                                                                                                                                | 7.6  | 10 (8.5-11.6)    | 44.8 (36.6-54)       | 1.4 (1.2-1.7)  | 1.7 (1.4-2.1) |
| Vermont                                                                                                                             | 6.9  | 9.1 (7.8-10.6)   | 32.4 (26.8-38.7)     | 5.2 (4.3-6.2)  | 3.6 (3-4.4)   |
| Virginia                                                                                                                            | 8.9  | 11.4 (9.7-13.3)  | 421.9 (359.7-493.8)  | 5 (4.2-5.8)    | 4.2 (3.6-4.9) |
| Washington                                                                                                                          | 7.9  | 10.3 (8.8-12)    | 301.8 (255.8-355.2)  | 4.1 (3.5-4.8)  | 3.5 (3-4.1)   |
| West Virginia                                                                                                                       | 9.8  | 12 (10.3-14.1)   | 161.2 (136.4-189.3)  | 8.9 (7.5-10.4) | 6 (5.1-7)     |
| Wisconsin                                                                                                                           | 9.8  | 11.9 (10.2-13.9) | 334.3 (283.7-389)    | 5.8 (4.9-6.7)  | 4.5 (3.8-5.2) |
| Wyoming                                                                                                                             | 4.7  | 5.6 (4.8-6.6)    | 12.1 (9.5-15)        | 2.1 (1.6-2.6)  | 1.7 (1.3-2.1) |
| Abbreviations: PM <sub>2.5</sub> , ambient fine particulate matter; PAF, population attributable fraction; UI, uncertainty interval |      |                  |                      |                |               |

**eTable 5k:** Death due to pneumonia associated with PM<sub>2.5</sub> in the contiguous US and by state

| Location                | PM <sub>2.5</sub><br>(µg/m <sup>3</sup> ) | PAF (%) (95% UI) | Number of deaths (95% UI) | Rate (per<br>100,000) (95% UI) | Age-standardized<br>rate (per 100,000)<br>(95% UI) |
|-------------------------|-------------------------------------------|------------------|---------------------------|--------------------------------|----------------------------------------------------|
| Contiguous US           | 10.1                                      | 18 (15.7-21.9)   | 8854.9 (7696.2-10710.6)   | 2.7 (2.4-3.3)                  | 2.3 (2-2.8)                                        |
| Alabama                 | 11.6                                      | 21.8 (19.2-25.9) | 243.2 (211.3-289.3)       | 5 (4.3-5.9)                    | 4.2 (3.6-4.9)                                      |
| Arizona                 | 9.5                                       | 16.6 (14.3-20.4) | 125.6 (107-152.9)         | 1.8 (1.5-2.2)                  | 1.4 (1.2-1.8)                                      |
| Arkansas                | 10.3                                      | 18.8 (16.4-22.7) | 121.5 (104.4-146.7)       | 4 (3.5-4.9)                    | 3.3 (2.9-4)                                        |
| California              | 12.2                                      | 22.7 (20.1-26.8) | 1291.1 (1143.6-1518.4)    | 3.3 (2.9-3.8)                  | 3 (2.6-3.5)                                        |
| Colorado                | 7.3                                       | 10.9 (8.8-14.3)  | 48.1 (38.2-63.5)          | 0.9 (0.7-1.1)                  | 0.8 (0.7-1.1)                                      |
| Connecticut             | 8.5                                       | 14.2 (11.8-17.9) | 85.7 (69.6-107.4)         | 2.4 (1.9-3)                    | 1.7 (1.3-2.1)                                      |
| Delaware                | 9.7                                       | 17.4 (14.9-21.3) | 28.4 (22.6-35.9)          | 3 (2.3-3.7)                    | 2.3 (1.8-2.9)                                      |
| District of<br>Columbia | 9.7                                       | 17.4 (14.9-21.3) | 12.3 (9-16.3)             | 1.8 (1.3-2.3)                  | 1.8 (1.3-2.3)                                      |
| Florida                 | 7.6                                       | 11.6 (9.4-15.1)  | 324.2 (259.8-431.3)       | 1.5 (1.2-2.1)                  | 1 (0.8-1.4)                                        |
| Georgia                 | 11.0                                      | 20.4 (18-24.4)   | 270.4 (234.4-323.4)       | 2.6 (2.2-3.1)                  | 2.7 (2.3-3.2)                                      |
| Idaho                   | 9.2                                       | 16 (13.7-19.9)   | 30.2 (24.2-38)            | 1.8 (1.4-2.2)                  | 1.6 (1.3-2.1)                                      |
| Illinois                | 13.3                                      | 25.3 (22.6-29.6) | 547.1 (488.6-638.9)       | 4.3 (3.8-5)                    | 3.6 (3.2-4.2)                                      |
| Indiana                 | 12.2                                      | 23.2 (20.6-27.3) | 216.5 (187-255.6)         | 3.2 (2.8-3.8)                  | 2.8 (2.4-3.3)                                      |
| Iowa                    | 9.3                                       | 16.3 (13.9-20.1) | 74.5 (61.2-91.9)          | 2.4 (1.9-2.9)                  | 1.7 (1.4-2.1)                                      |
| Kansas                  | 9.4                                       | 16.5 (14.1-20.4) | 71.3 (59.3-88.8)          | 2.4 (2-3)                      | 1.9 (1.6-2.4)                                      |
| Kentucky                | 11.2                                      | 21 (18.5-25)     | 172 (148.1-204.2)         | 3.9 (3.3-4.6)                  | 3.3 (2.9-4)                                        |
| Louisiana               | 9.2                                       | 16.2 (13.8-20)   | 114.8 (94.5-141.2)        | 2.5 (2-3)                      | 2.2 (1.8-2.7)                                      |
| Maine                   | 7.5                                       | 11.6 (9.3-15.1)  | 26.9 (20.4-36.5)          | 2 (1.5-2.7)                    | 1.4 (1-1.9)                                        |
| Maryland                | 10.3                                      | 18.8 (16.4-22.7) | 168.4 (143.4-203.6)       | 2.8 (2.4-3.4)                  | 2.4 (2-2.9)                                        |
| Massachusetts           | 7.9                                       | 12.4 (10.1-16)   | 157.9 (127.2-205)         | 2.3 (1.9-3)                    | 1.8 (1.4-2.3)                                      |
| Michigan                | 10.7                                      | 19.6 (17.2-23.5) | 308.7 (268.2-374.4)       | 3.1 (2.7-3.8)                  | 2.4 (2.1-3)                                        |
| Minnesota               | 7.9                                       | 12.5 (10.3-16.1) | 63.7 (50.7-82.8)          | 1.1 (0.9-1.5)                  | 0.9 (0.7-1.2)                                      |
| Mississippi             | 10.1                                      | 18.3 (15.9-22.2) | 134.1 (114.6-164)         | 4.5 (3.8-5.5)                  | 3.9 (3.4-4.8)                                      |
| Missouri                | 10.6                                      | 19.6 (17.1-23.5) | 212 (183.6-256.7)         | 3.5 (3-4.2)                    | 2.8 (2.4-3.4)                                      |

|                                                                                                                                     |      |                  |                     |               |               |
|-------------------------------------------------------------------------------------------------------------------------------------|------|------------------|---------------------|---------------|---------------|
| Montana                                                                                                                             | 7.1  | 10.2 (8.2-13.6)  | 13.5 (9.8-18.9)     | 1.3 (0.9-1.8) | 1 (0.7-1.4)   |
| Nebraska                                                                                                                            | 8.6  | 14.6 (12.2-18.2) | 47.5 (38.3-59.6)    | 2.5 (2-3.1)   | 1.9 (1.5-2.4) |
| Nevada                                                                                                                              | 9.0  | 15.5 (13.1-19.2) | 93.7 (77.7-116.3)   | 3.1 (2.6-3.9) | 2.9 (2.4-3.6) |
| New Hampshire                                                                                                                       | 7.5  | 11.6 (9.3-15)    | 21.7 (16.5-28.6)    | 1.6 (1.2-2.1) | 1.2 (0.9-1.6) |
| New Jersey                                                                                                                          | 9.9  | 17.8 (15.4-21.7) | 223.4 (189.7-270.4) | 2.5 (2.1-3)   | 1.9 (1.7-2.4) |
| New Mexico                                                                                                                          | 6.7  | 9.2 (7.2-12.5)   | 28.1 (21-38.3)      | 1.3 (1-1.8)   | 1.1 (0.8-1.5) |
| New York                                                                                                                            | 9.4  | 16.7 (14.3-20.5) | 711.2 (602.8-877)   | 3.6 (3-4.4)   | 2.8 (2.3-3.4) |
| North Carolina                                                                                                                      | 10.3 | 18.8 (16.4-22.7) | 339.6 (293.9-404.5) | 3.3 (2.9-3.9) | 2.9 (2.5-3.4) |
| North Dakota                                                                                                                        | 6.0  | 7.1 (5.4-10.3)   | 8.9 (6.2-13.2)      | 1.2 (0.8-1.7) | 0.9 (0.6-1.4) |
| Ohio                                                                                                                                | 12.0 | 22.7 (20.1-26.8) | 449.3 (392.2-529.2) | 3.9 (3.4-4.5) | 3 (2.6-3.5)   |
| Oklahoma                                                                                                                            | 9.6  | 17.2 (14.7-21.1) | 89.9 (74.9-109.6)   | 2.3 (1.9-2.8) | 2 (1.7-2.4)   |
| Oregon                                                                                                                              | 8.6  | 14.5 (12.1-18.2) | 53.6 (42.9-69.5)    | 1.3 (1-1.7)   | 1 (0.8-1.4)   |
| Pennsylvania                                                                                                                        | 10.9 | 20.1 (17.7-24)   | 493.7 (432.5-598.5) | 3.9 (3.4-4.7) | 2.7 (2.3-3.2) |
| Rhode Island                                                                                                                        | 7.1  | 10.4 (8.2-13.8)  | 17.6 (13.1-24)      | 1.7 (1.2-2.3) | 1.2 (0.9-1.6) |
| South Carolina                                                                                                                      | 10.0 | 18.2 (15.7-22)   | 111.5 (94.3-134.8)  | 2.2 (1.9-2.7) | 1.9 (1.6-2.3) |
| South Dakota                                                                                                                        | 6.6  | 8.9 (7-12.2)     | 16.1 (12-23.1)      | 1.9 (1.4-2.7) | 1.4 (1.1-2)   |
| Tennessee                                                                                                                           | 10.2 | 18.7 (16.3-22.6) | 283.7 (243.5-345.9) | 4.2 (3.6-5.2) | 3.6 (3.1-4.4) |
| Texas                                                                                                                               | 10.3 | 18.9 (16.4-22.8) | 480.8 (417-580.3)   | 1.7 (1.5-2.1) | 1.8 (1.6-2.2) |
| Utah                                                                                                                                | 7.6  | 11.9 (9.7-15.3)  | 33.5 (26.1-43.4)    | 1.1 (0.8-1.4) | 1.4 (1-1.8)   |
| Vermont                                                                                                                             | 6.9  | 9.7 (7.7-13.1)   | 6.8 (4.7-9.7)       | 1.1 (0.8-1.6) | 0.8 (0.5-1.1) |
| Virginia                                                                                                                            | 8.9  | 15.4 (13-19.2)   | 171.4 (142.3-213.3) | 2 (1.7-2.5)   | 1.8 (1.5-2.2) |
| Washington                                                                                                                          | 7.9  | 12.6 (10.4-16.2) | 91.5 (73.1-120.2)   | 1.2 (1-1.6)   | 1.1 (0.9-1.4) |
| West Virginia                                                                                                                       | 9.8  | 17.5 (15.1-21.4) | 73.3 (60.7-89.9)    | 4 (3.3-5)     | 2.9 (2.4-3.6) |
| Wisconsin                                                                                                                           | 9.8  | 17.4 (15-21.2)   | 142.1 (119.2-171.6) | 2.5 (2.1-3)   | 1.9 (1.6-2.3) |
| Wyoming                                                                                                                             | 4.7  | 4.1 (2.9-6.6)    | 4.2 (2.7-7)         | 0.7 (0.5-1.2) | 0.6 (0.4-1.1) |
| Abbreviations: PM <sub>2.5</sub> , ambient fine particulate matter; PAF, population attributable fraction; UI, uncertainty interval |      |                  |                     |               |               |



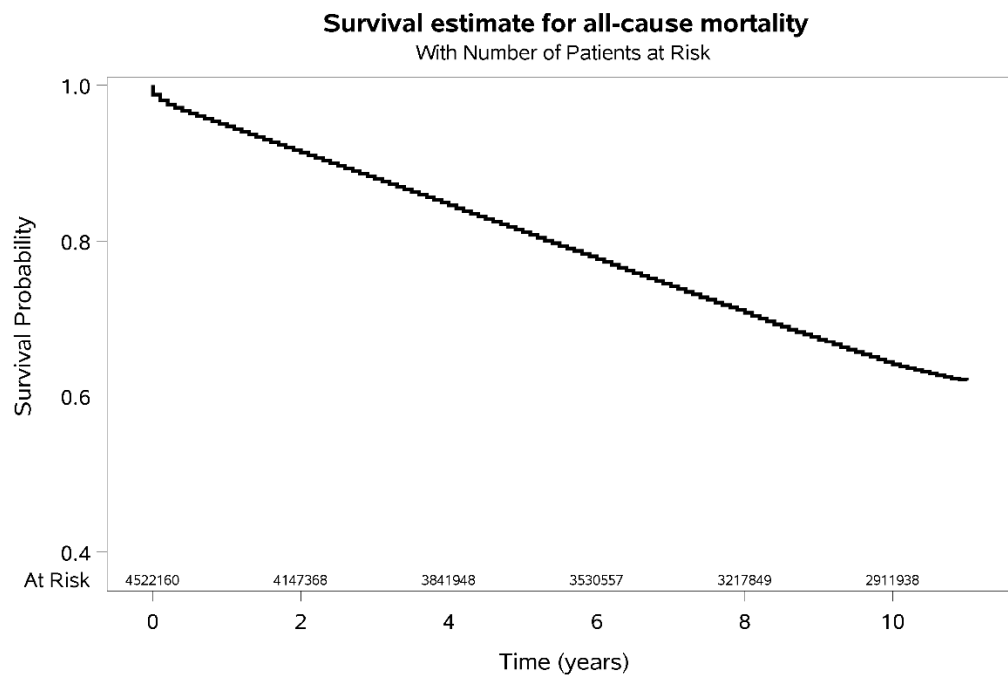

**eFigure 1: Kaplan-Meier Curve of all-cause mortality.** Number at risk in the cohort during follow-up is included at select time points.

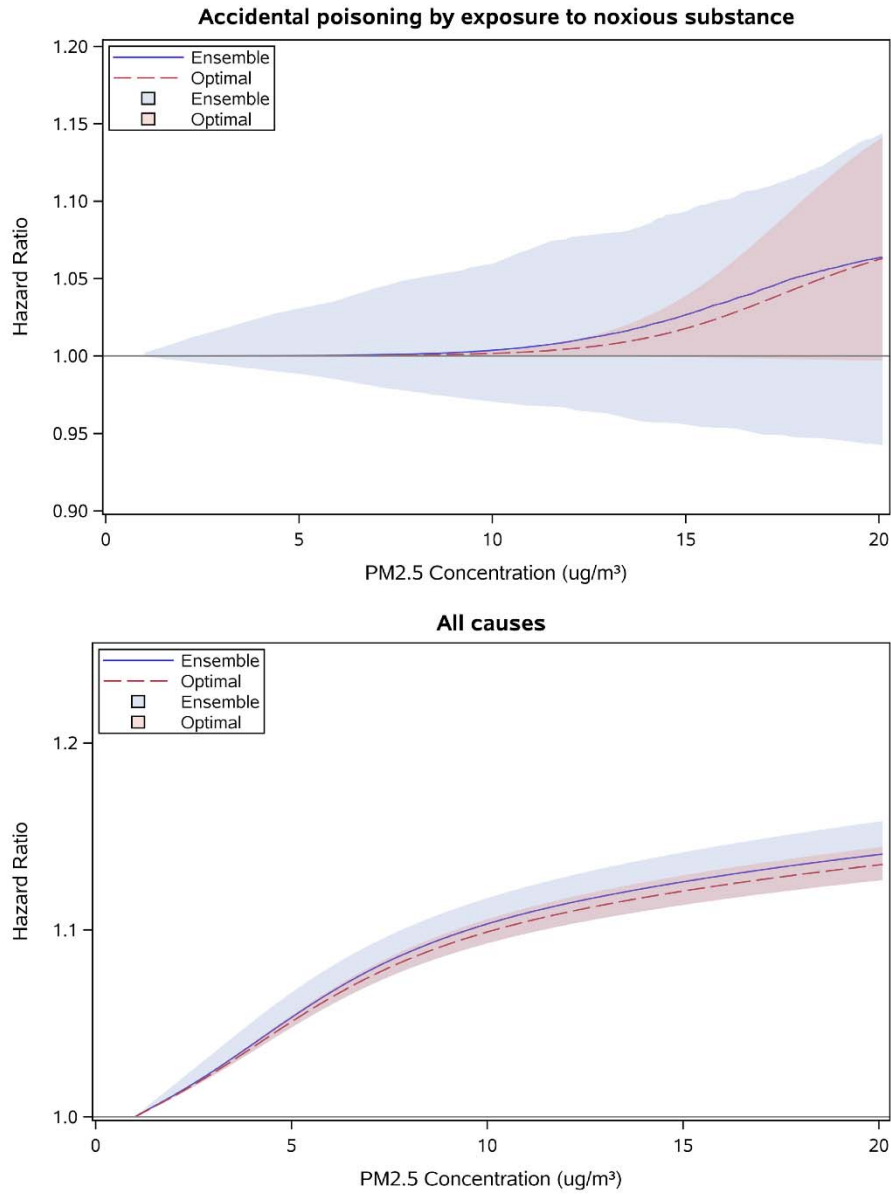

**eFigure 2: Non-linear exposure-response hazard functions for negative and positive outcome controls.** Curves are presented for accidental poisoning by exposure to noxious substance (negative outcome control) and all-cause (positive outcome control). Plots are presented for both the optimal and ensembled model. 95% UI are presented as bands.

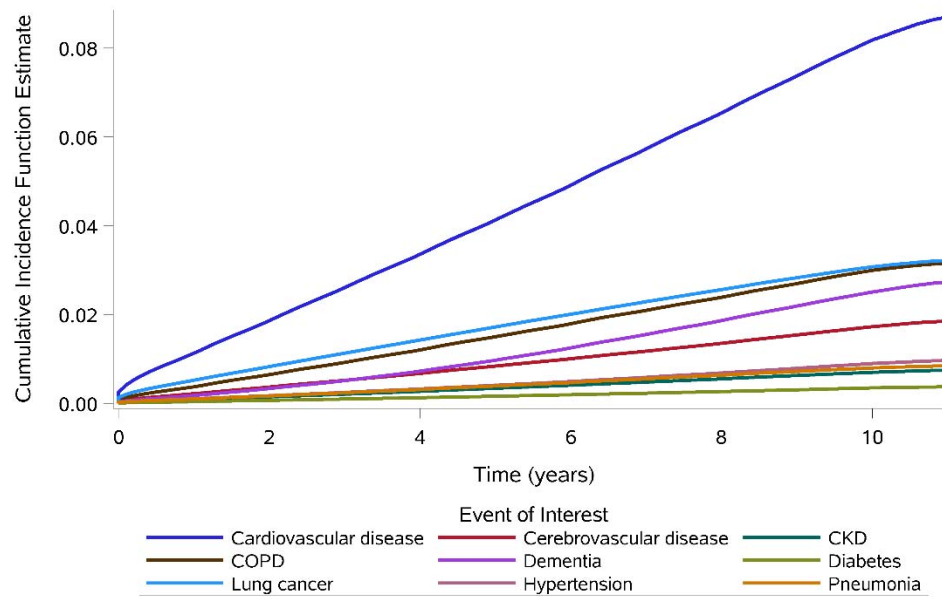

**eFigure 3: Cumulative incidence of specific causes of death.** Estimates of the Cumulative incidence function (%) are colored by cause of death.

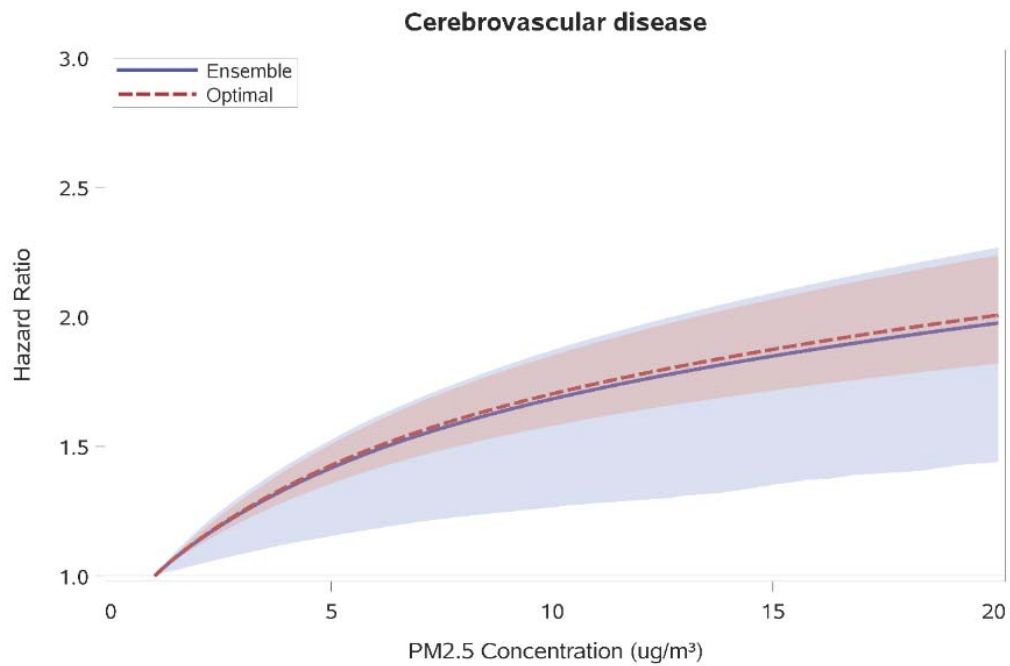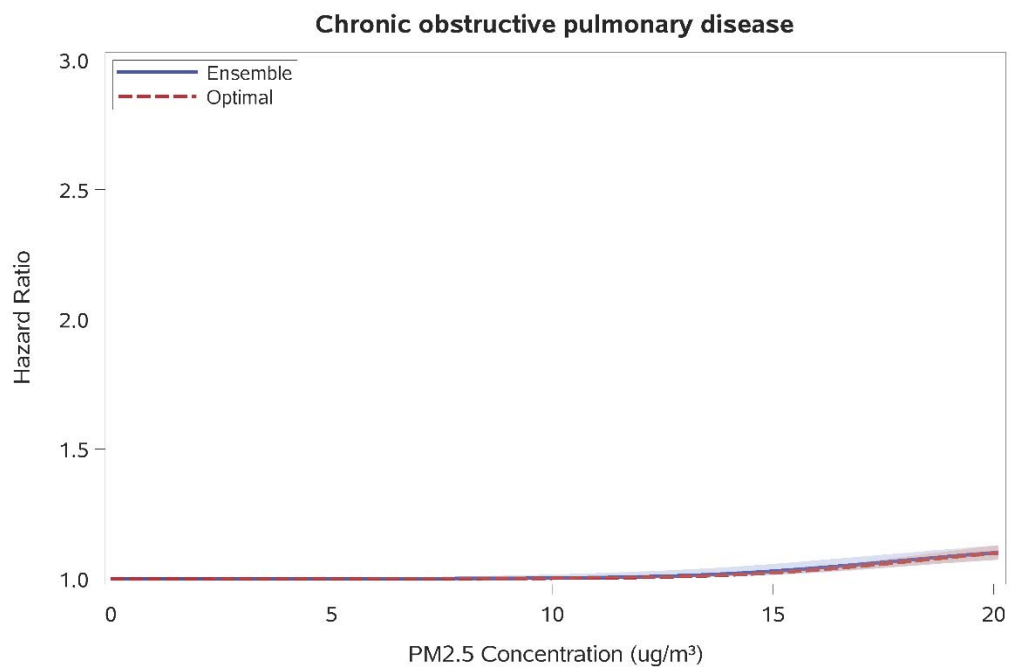

**eFigure 4a: Non-linear exposure-response hazard functions for cause-specific mortality** (continued). Plots are presented for both the optimal and ensembled model. 95% UI are presented as bands.

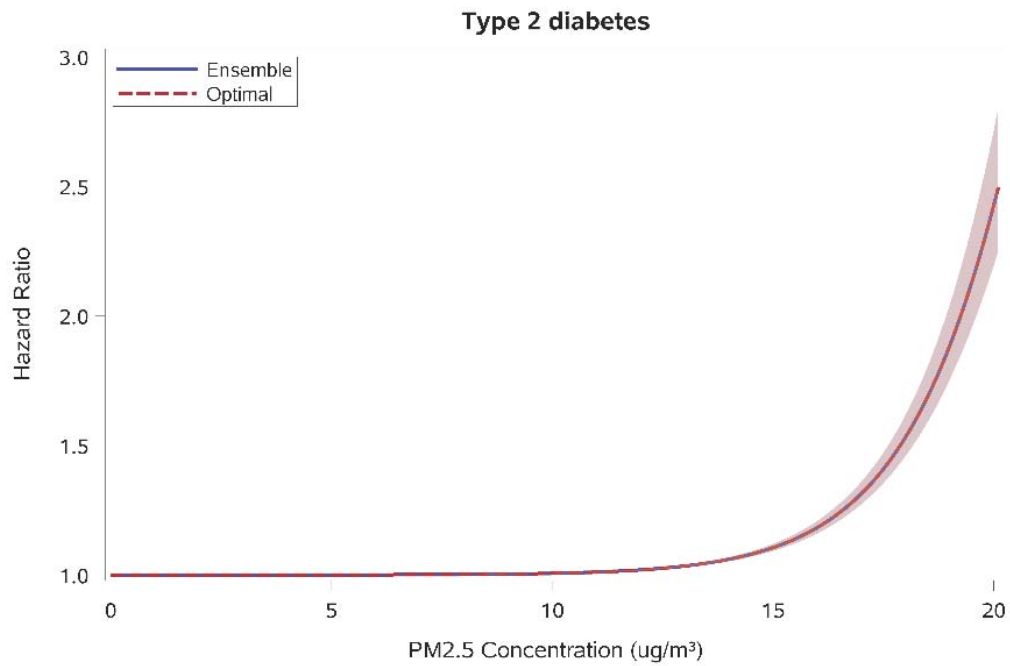

**eFigure 4b: Non-linear exposure-response hazard functions for cause-specific mortality** (continued). Plots are presented for both the optimal and ensemble model. 95% UI are presented as bands.

## Non-accidental causes

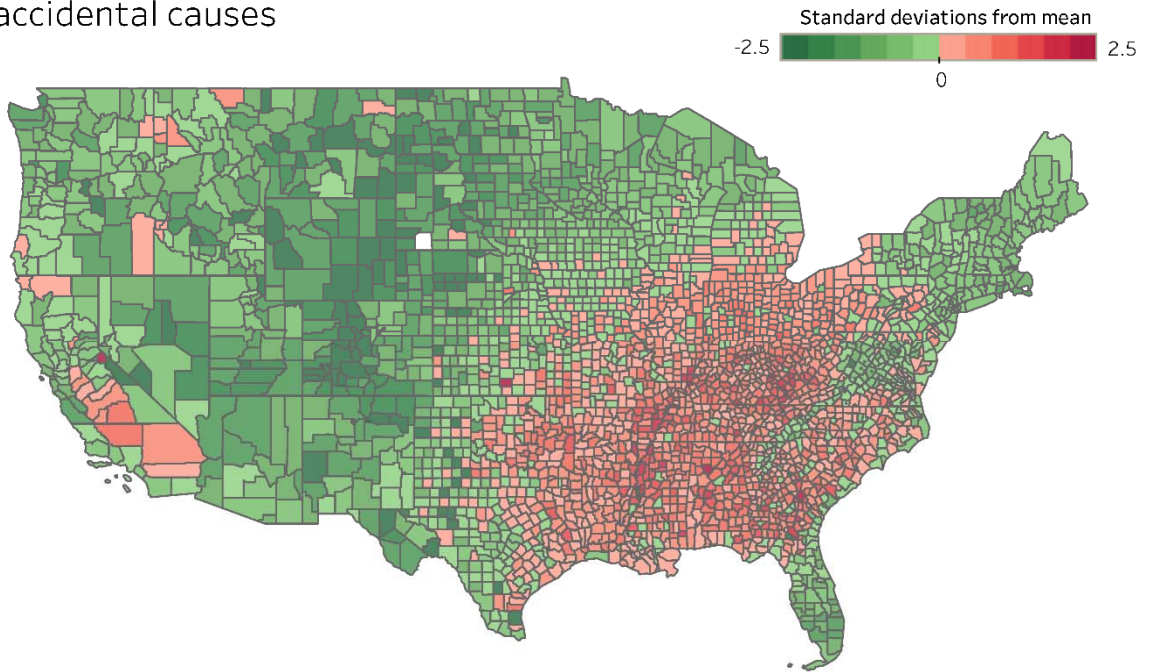

**eFigure 5: Map of the age-standardized death rates due to non-accidental causes associated with PM<sub>2.5</sub> in the contiguous United States by county.** Maps are colored by the number of standard deviations from the mean of the states.

## Non-communicable disease

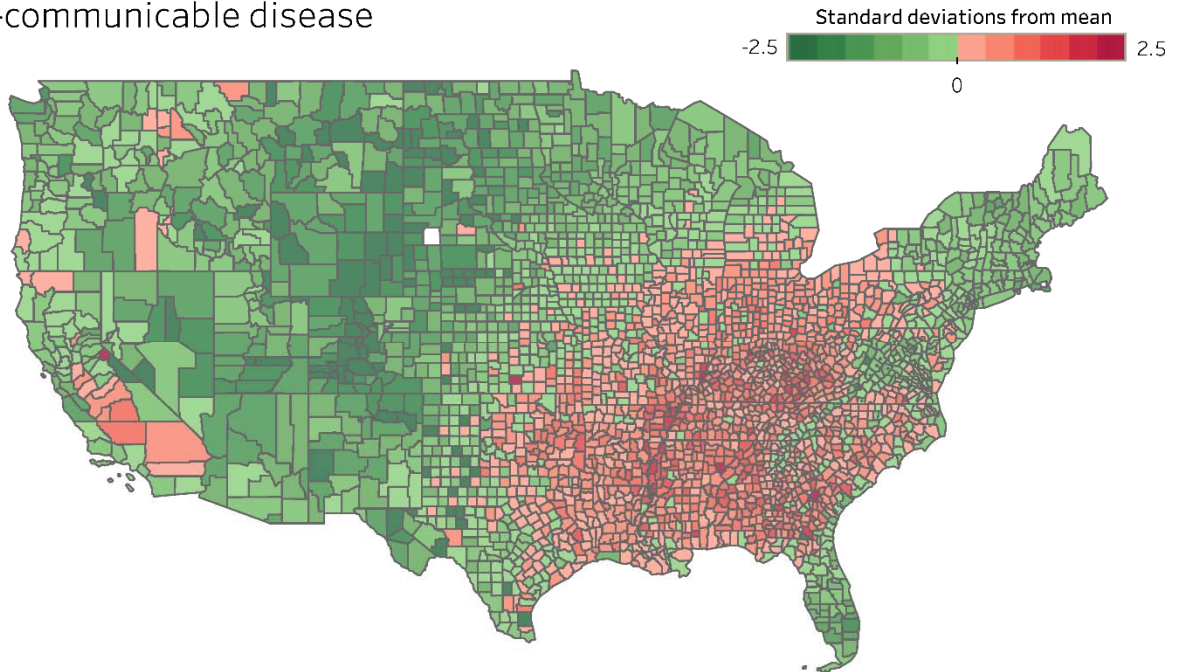

**eFigure 6: Map of the age-standardized death rates due to non-communicable diseases associated with PM<sub>2.5</sub> in the contiguous United States by county.** Maps are colored by the number of standard deviations from the mean of the states.

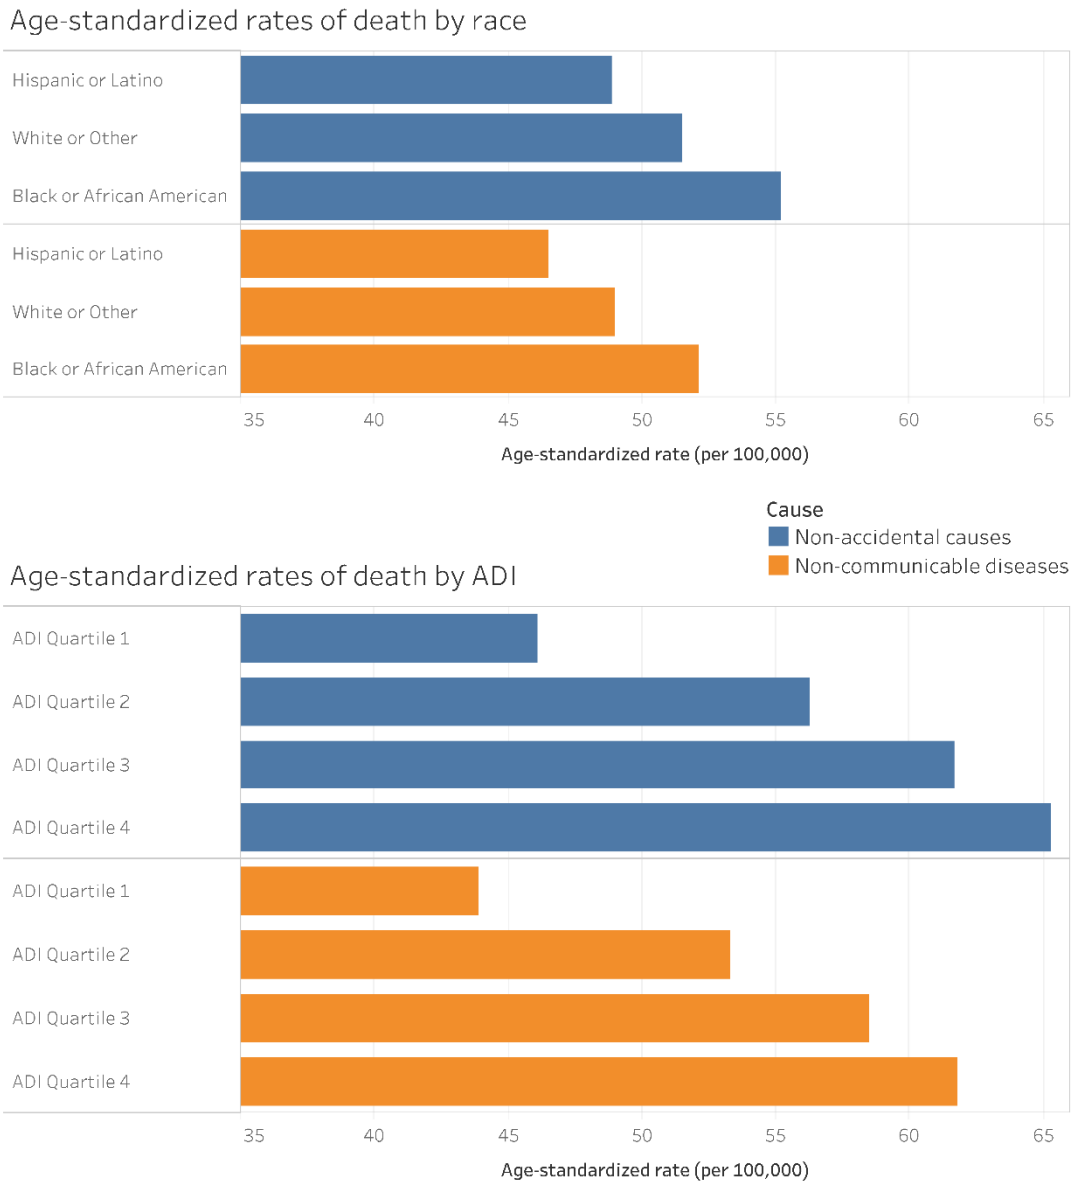

**eFigure 7: Age-standardized death rates due to non-accidental causes and non-communicable diseases associated with PM<sub>2.5</sub> by county Area Deprivation Index and percentage black or African American. Bars are colored by cause of death.**



### Non-accidental causes

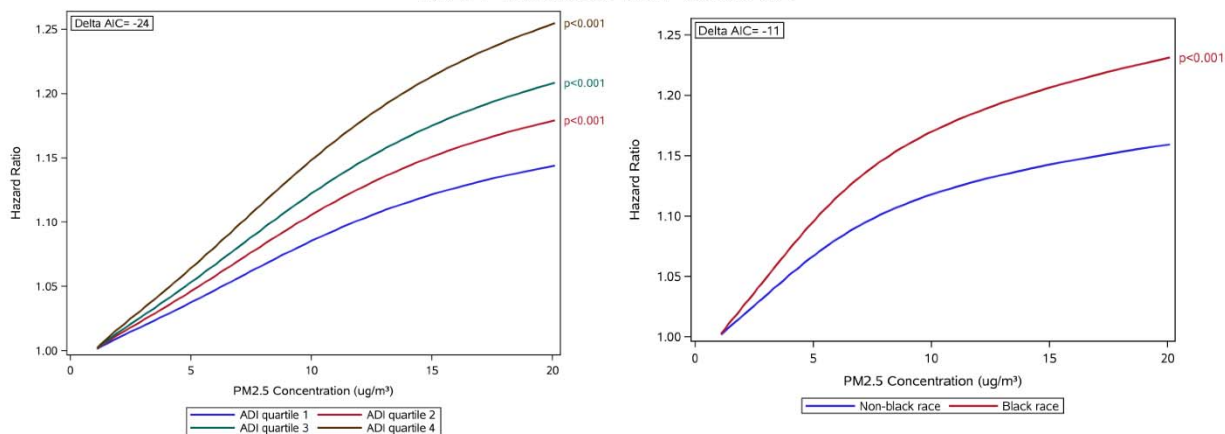

### Non-communicable diseases

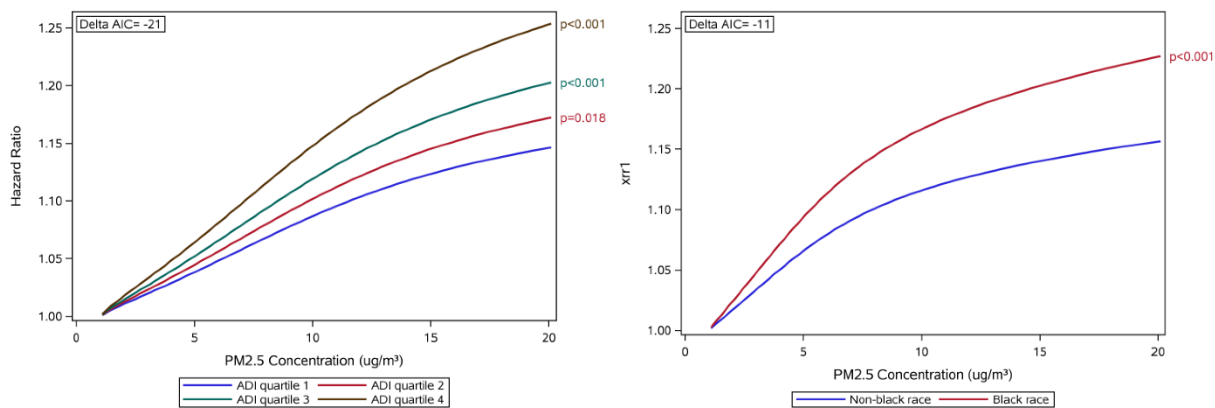

**eFigure 8: Effect modification of the association of PM<sub>2.5</sub> with risk of death due to non-accidental causes and non-communicable diseases by ADI quartile and black race.** Results from the optimal model are plotted. Curves are labeled with the p-value of the interaction. The change in AIC versus the non-interaction model is presented.

### Non-accidental causes

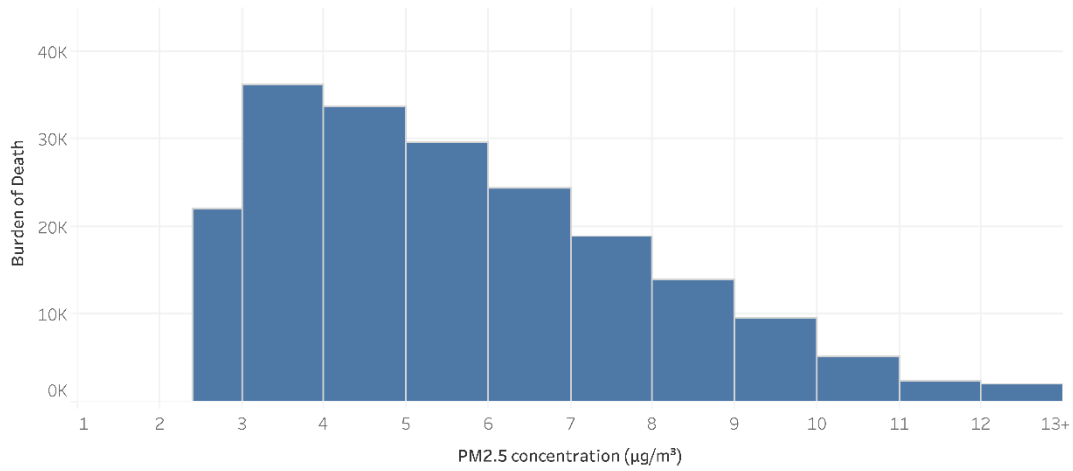

### Non-communicable diseases

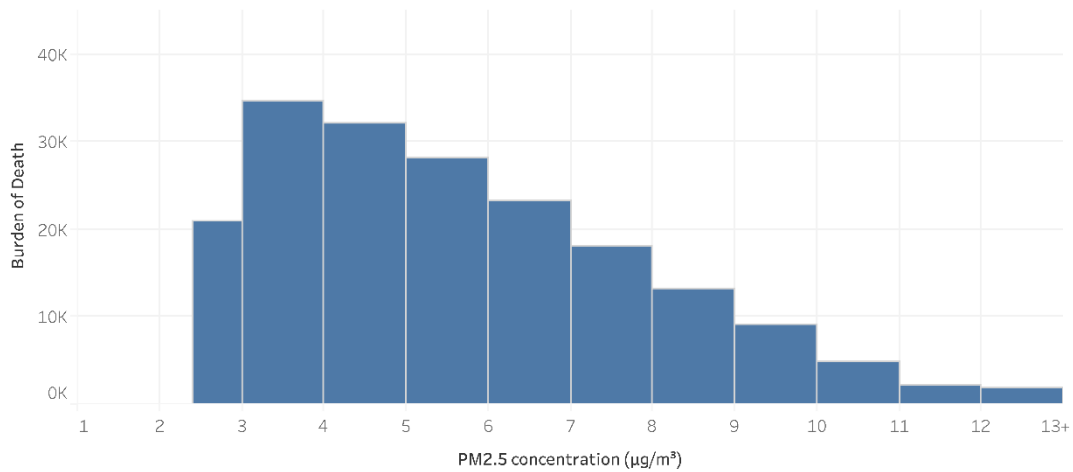

**eFigure 9: Burden of death due to non-accidental causes and non-communicable diseases associated with PM<sub>2.5</sub> in the contiguous US.** Bars represent the burden of death associated with PM<sub>2.5</sub> in the range the bars cover.

Cerebrovascular Disease

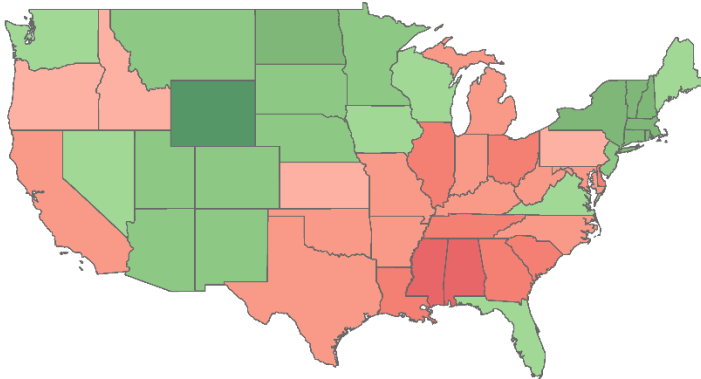

Chronic Obstructive Pulmonary Disease

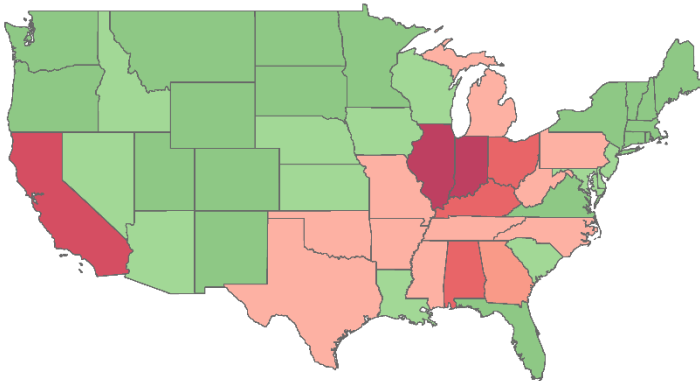

Type 2 Diabetes

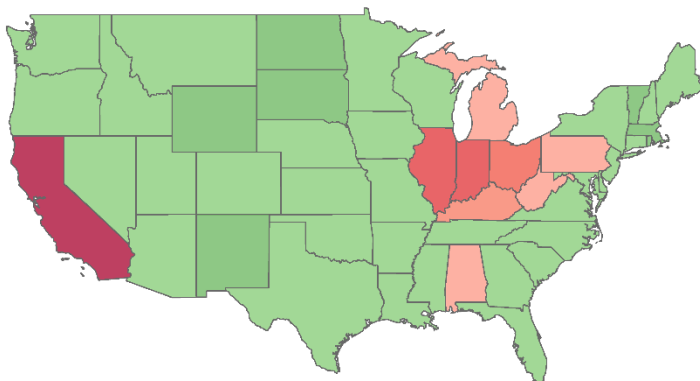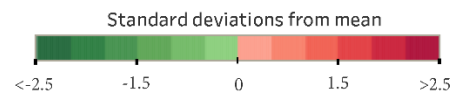

**eFigure 10: Maps of the age-standardized death rates due to specific causes associated with  $PM_{2.5}$  in the contiguous United States by state (continued). Maps are colored by the number of standard deviations from the mean of the states.**
